# Supplementary material for: Marine Debris in River Margins: Wet and Dry Weathering Effects on the Fragmentation and Degradation of Discarded Plastic
Source: Research Square preprint supplement (doi:10.21203/rs.3.rs-7303205/v1), 2025-08-19
Supplement: Supplementary file 2 [file b2d83f7a40df1e8a5843b4cc.docx]

**Supplemental Information - 2**

MARINE DEBRIS IN RIVER MARGINS: WET AND DRY WEATHERING EFFECTS ON THE FRAGMENTATION AND DEGRADATION OF DISCARDED PLASTIC

Natalie Mladenov1*, Ella Knight1, Alexi Olney2, Fernando Wakida3, Teresita de Jesus Piñon-Colin3, George Youssef4, Alicia Kinoshita1

1 Department of Civil, Construction, and Environmental Engineering, 5500 Campanile Drive, San Diego State University, San Diego, CA, USA

2 Department of Statistics, 5500 Campanile Drive, San Diego State University, San Diego, CA, USA

3 Universidad Autónoma de Baja California, Calzada Universidad 14418, Parque Industrial Internacional Tijuana, C.P. 22390 Tijuana, Baja California, Mexico

4 Department of Mechanical Engineering, 5500 Campanile Drive, San Diego State University, San Diego, CA, USA

* Corresponding author: nmladenov@sdsu.edu

This document contains:

- Supplementary Photographs, Figures S2-1 to S2-95

# Photographs of pristine item replicates

The photographs below were taken on 10 October 2022 prior to microcosm deployment.

## Items intended for wet weathering in creek water


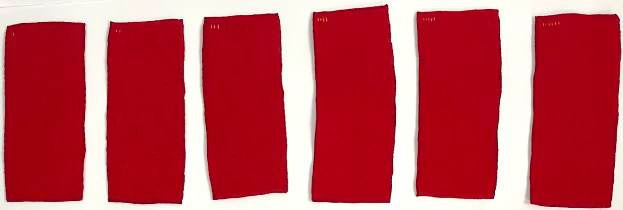


1 Pristine Wet Blanket, Samples 1-6


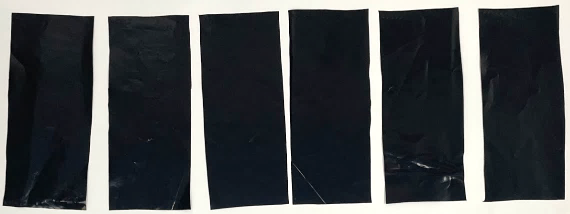


2 Pristine Wet Black Bag, Samples 1-6


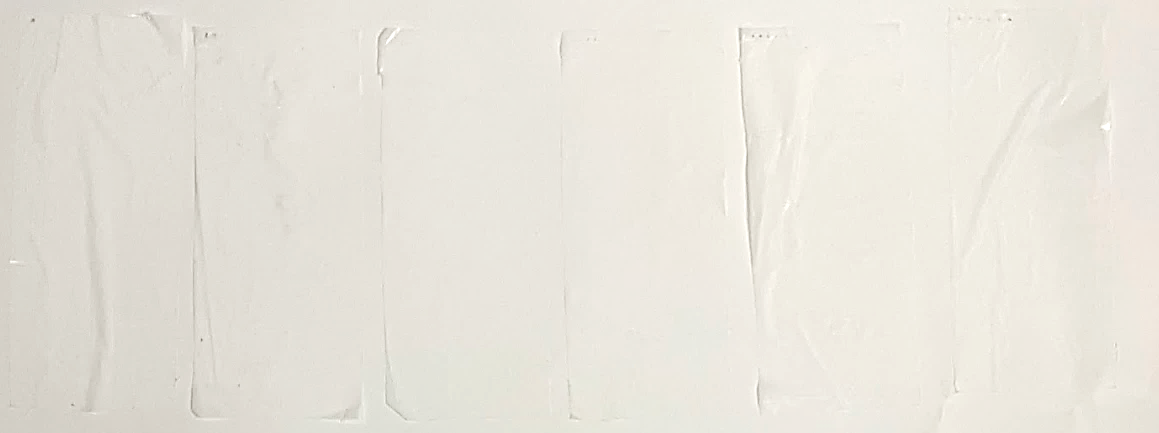


3 Pristine Wet White Bag, Samples 1-6


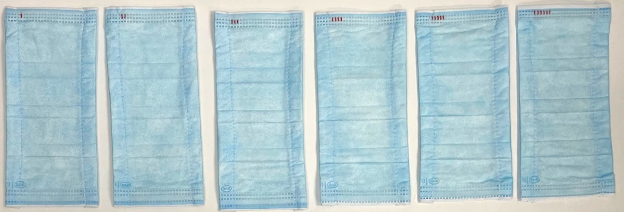


4 Pristine Wet Mask, Samples 1-6


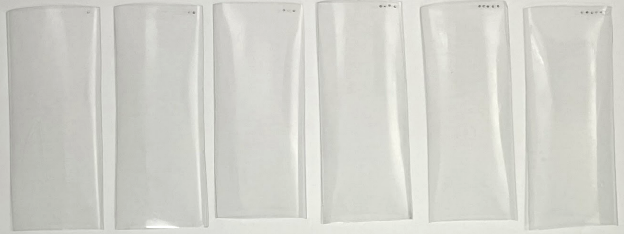


5 Pristine Wet Water Bottle, Samples 1-6


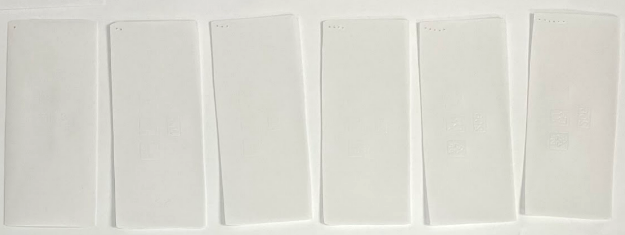


6 Pristine Wet Styrofoam, Samples 1-6


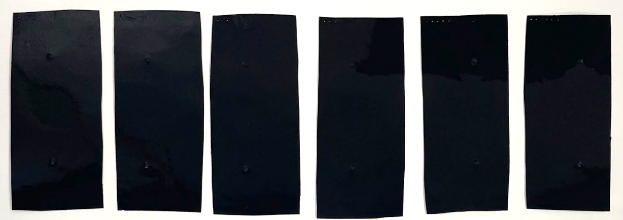


7 Pristine Wet Black To-Go, Samples 1-6


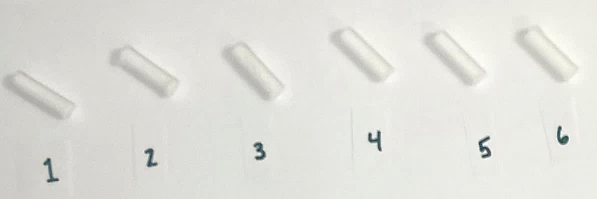


8 Pristine Wet Cigarette Butts, Samples 1-6


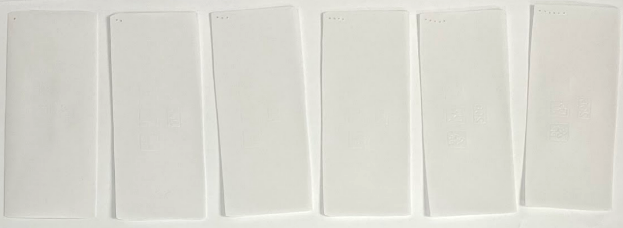


9 Pristine Wet Bioplastic, Samples 1-6


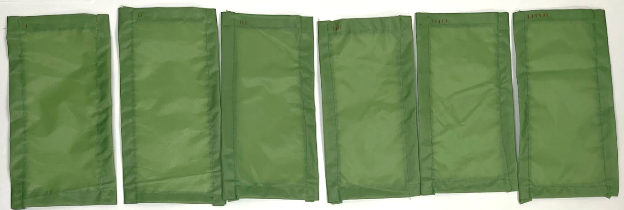


10 Pristine Wet Tent, Samples 1-6

## Items intended for dry weathering


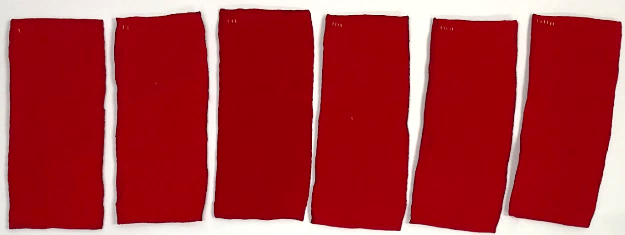


11 Pristine Dry Blanket, Samples 1-6


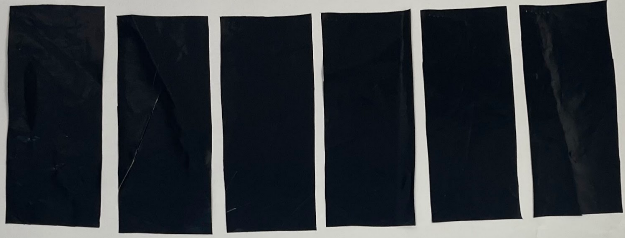


12 Pristine Dry Black Bag, Samples 1-6


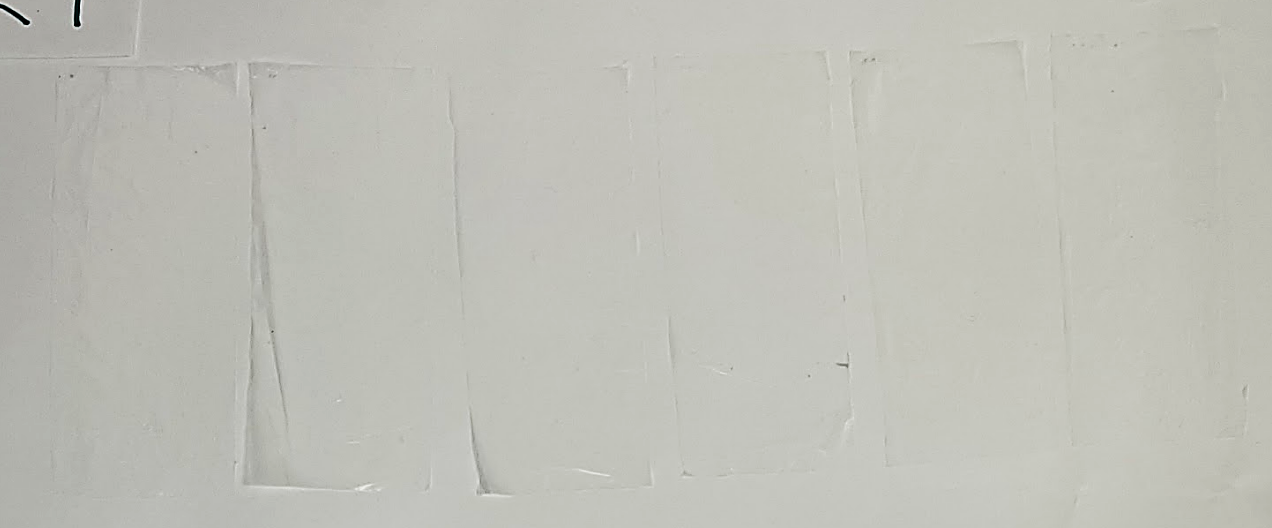


13 Pristine Dry White Bag, Samples 1-6


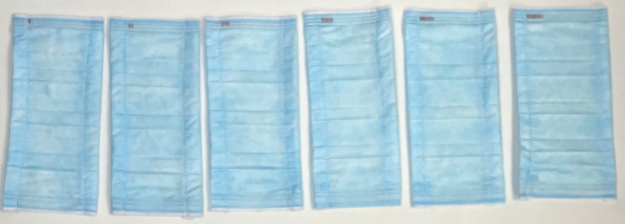


14 Pristine Dry Mask, Samples 1-6


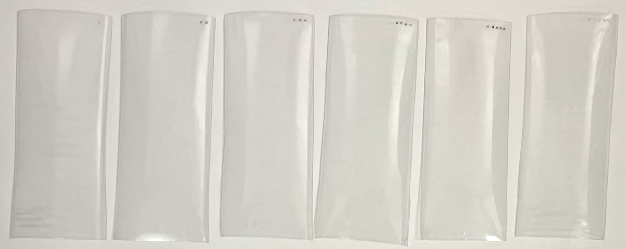


15 Pristine Dry Water Bottle, Samples 1-6


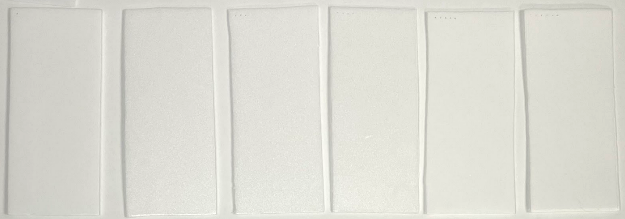


16 Pristine Dry Styrofoam, Samples 1-6


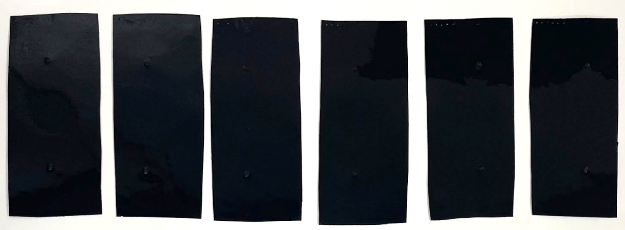


17 Pristine Dry Black To-Go, Samples 1-6


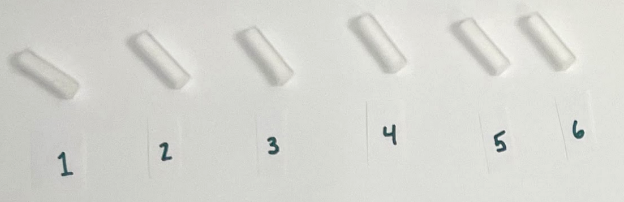


18 Pristine Dry Cigarette Butts, Samples 1-6


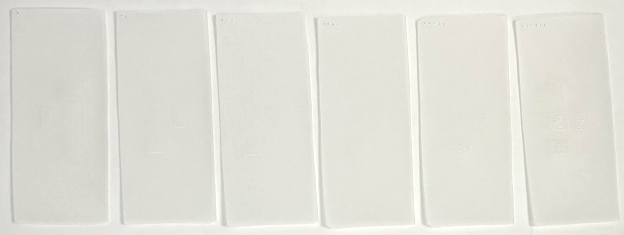


19 Pristine Dry Bioplastic, Samples 1-6


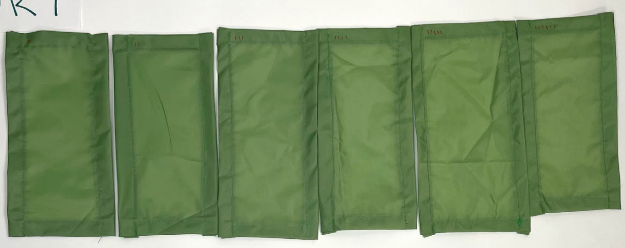


20 Pristine Dry Tent, Samples 1-6

## 1.3 Items intended for wet weathering in DI water


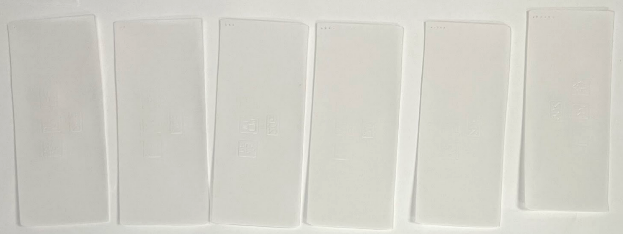


21 Pristine DI Bioplastic, Samples 1-6


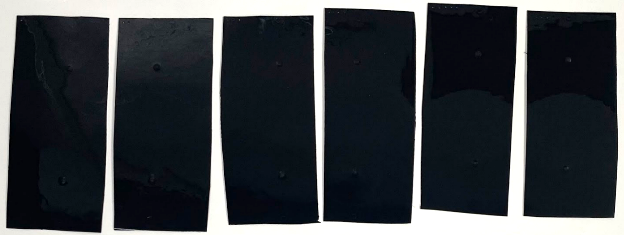


22 Pristine DI Black To-Go, Samples 1-6

# Weathered items

The photographs below were taken on 10 July 2023 (after 271 days of weathering).

## 2.1 Items placed into wet weathering tanks filled with creek water


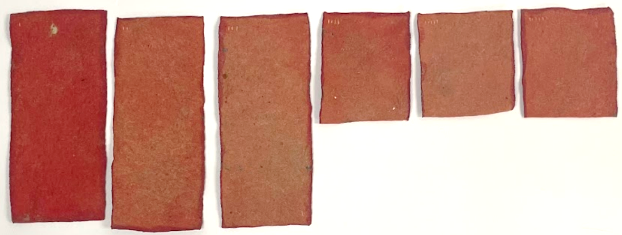


23 Weathered Wet Blanket, Front, Samples 1-6


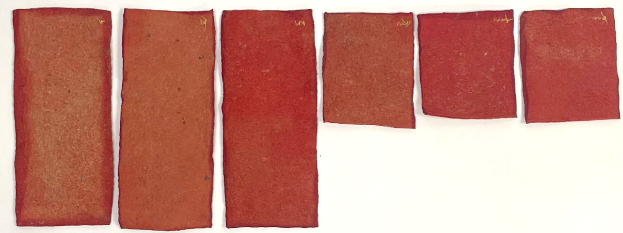


24 Weathered Wet Blanket, Back, Samples 1-6


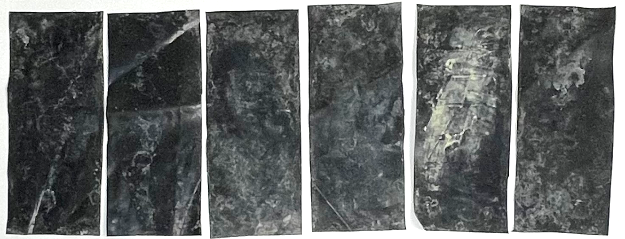


25 Weathered Wet Black Bag, Front, Samples 1-6


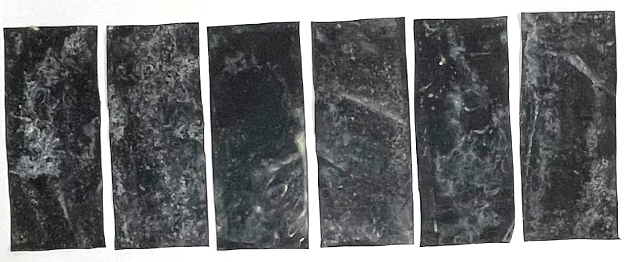


26 Weathered Wet Black Bag, Back, Samples 1-6


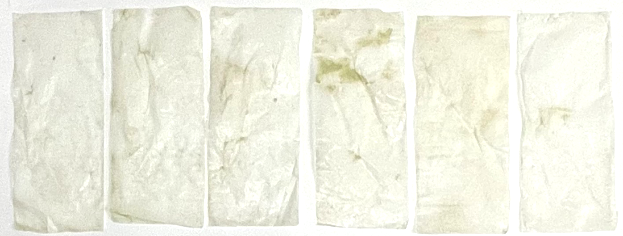


27 Wet Weathered White Bag, Front, Samples 1-6


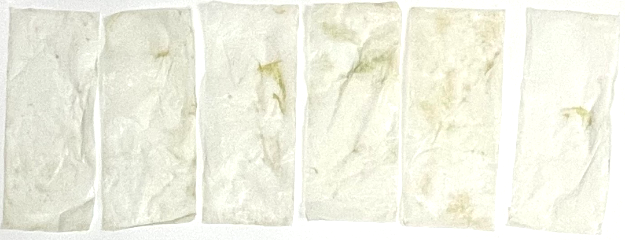


28 Wet Weathered White Bag, Back, Samples 1-6


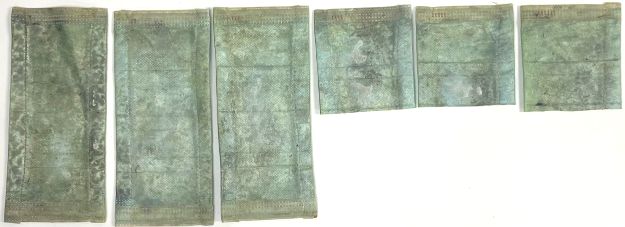


29 Wet Weathered Mask, Front, Samples 1-6


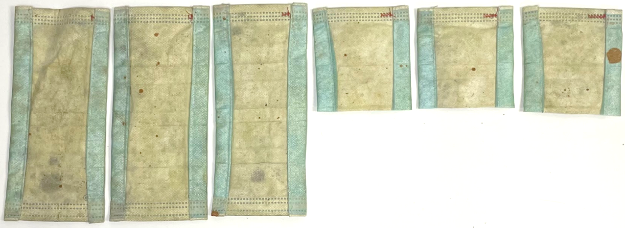


30 Wet Weathered Mask, Back, Samples 1-6


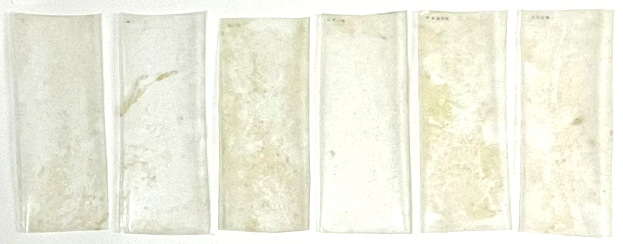


31 Wet Weathered Water Bottle, Front, Samples 1-6


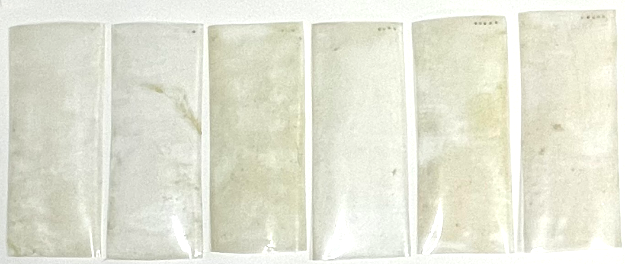


32 Wet Weathered Water Bottle, Back, Samples 1-6


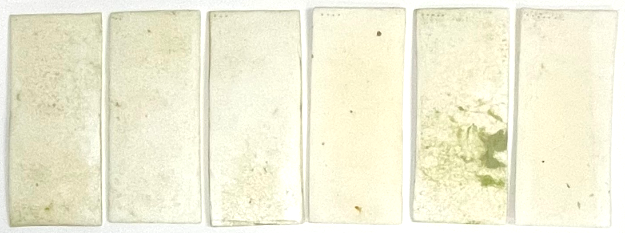


33 Wet Weathered Styrofoam, Front, Samples 1-6


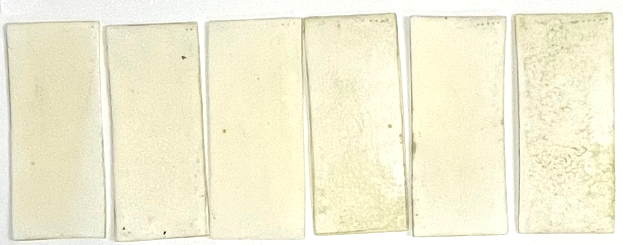


34 Wet Weathered Styrofoam, Back, Samples 1-6


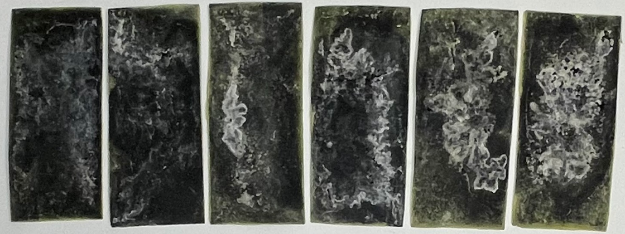


35 Wet Weathered Black To-Go, Front, Samples 1-6


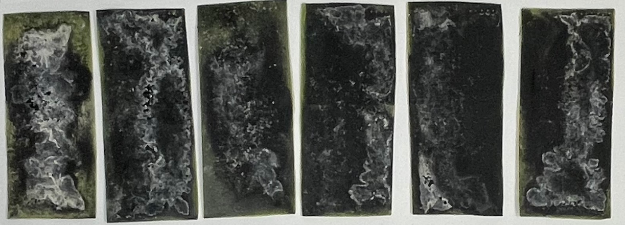


36 Wet Weathered Black To-Go, Back, Samples 1-6


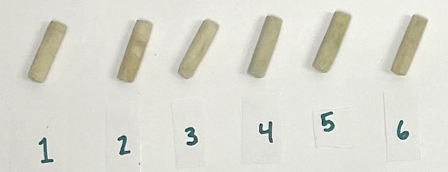


37 Wet Weathered, Cigarette Butts, Samples 1-6


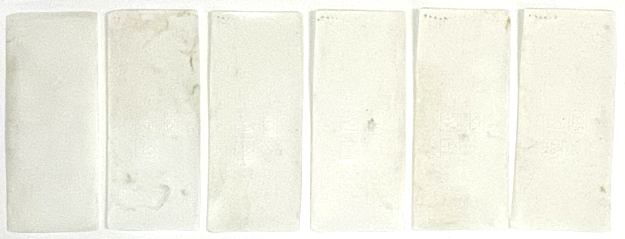


38 Wet Weathered Bioplastic, Front, Samples 1-6


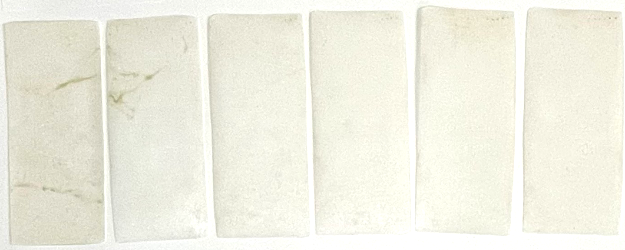


39 Wet Weathered Bioplastic, Back, Samples 1-6


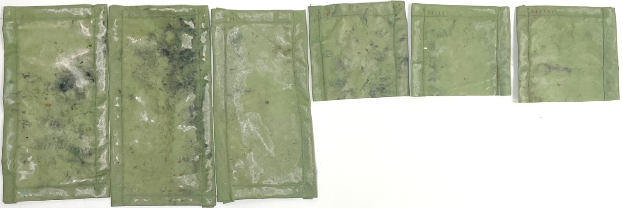


40 Wet Weathered Tent, Front, Samples 1-6


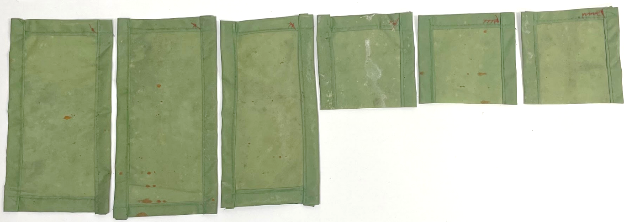


41 Wet Weathered Tent, Back, Samples 1-6

## Items placed into dry weathering enclosures


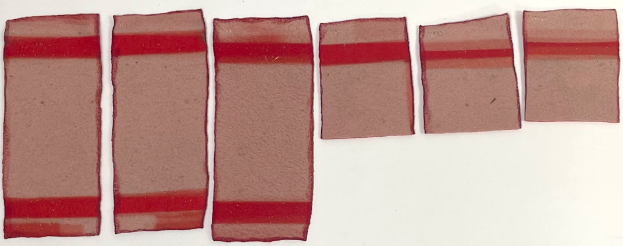


42 Dry Weathered Blanket. Front, Samples 1-6


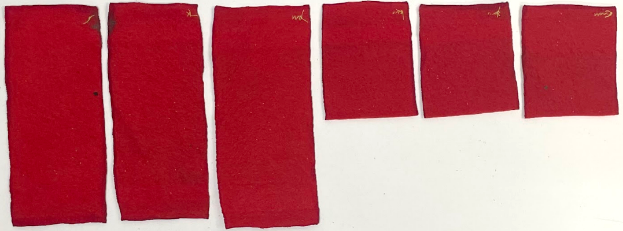


43 Dry Weathered Blanket, Back, Samples 1-6


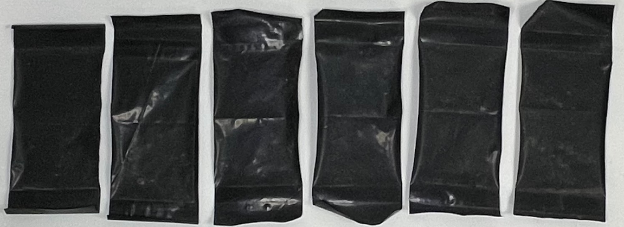


44 Dry Weathered Black Bag, Front, Samples 1-6


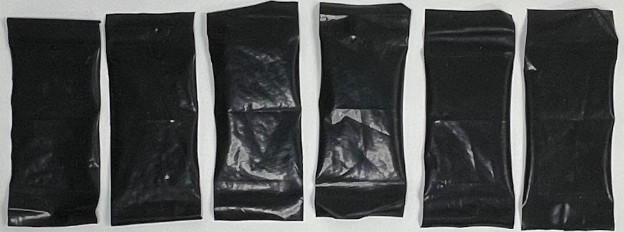


45 Dry Weathered Black Bag, Back, Samples 1-6


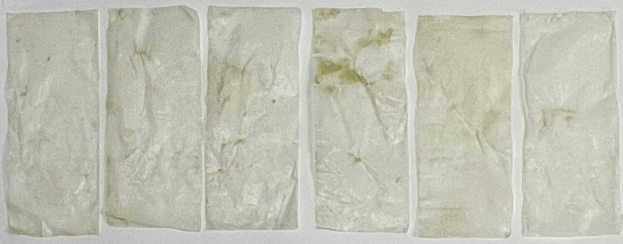


46 Dry Weathered White Bag, Front, Samples 1-6


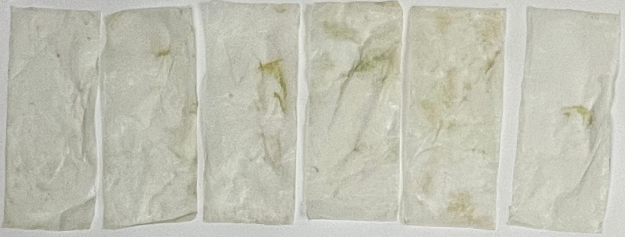


47 Dry Weathered White Bag, Back, Samples 1-6


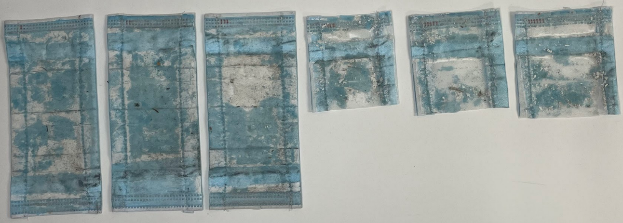


48 Dry Weathered Mask, Front, Samples 1-6


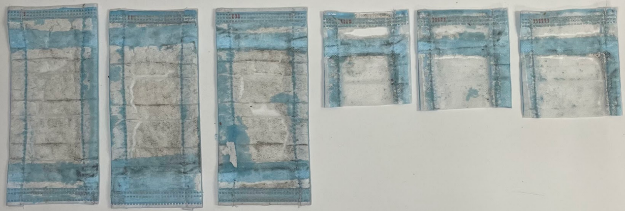


49 Dry Weathered Mask After Light Shaking, Front, Samples 1-6


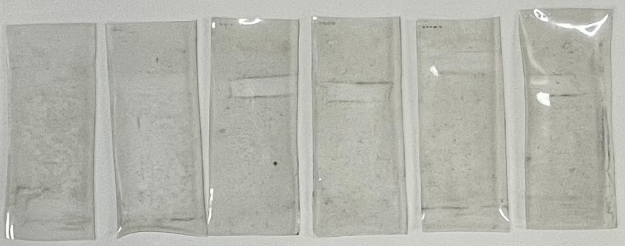


50 Dry Weathered Water Bottle, Front, Samples 1-6


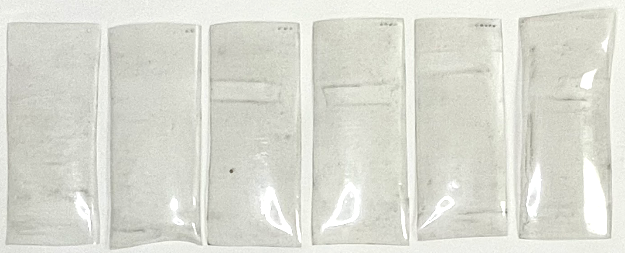


51 Dry Weathered Water Bottle, Back, Samples 1-6


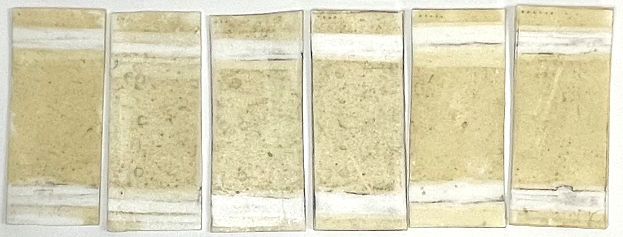


52 Dry Weathered Styrofoam, Front, Samples 1-6


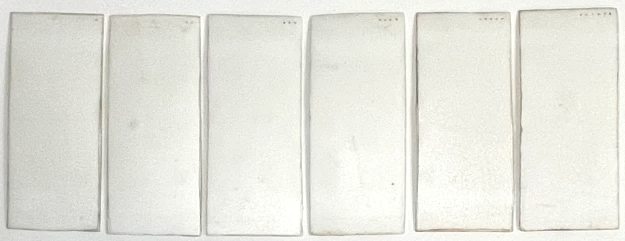


53 Dry Weathered Styrofoam, Back, Samples 1-6


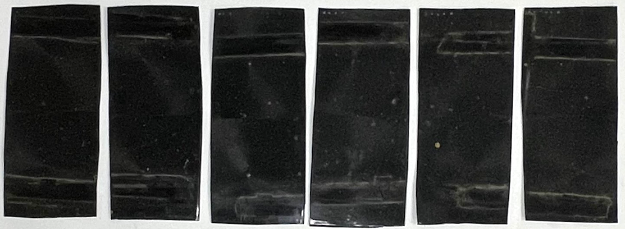


54 Dry Weathered Black To-Go, Front, Samples 1-6


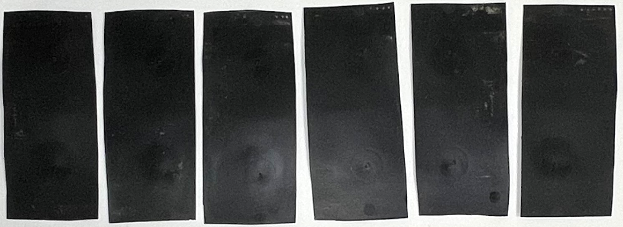


55 Dry Weathered Black To-Go, Back, Samples 1-6


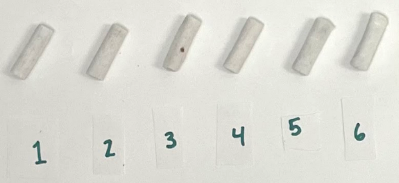


56 Dry Weathered Cigarette Butts, Samples 1-6


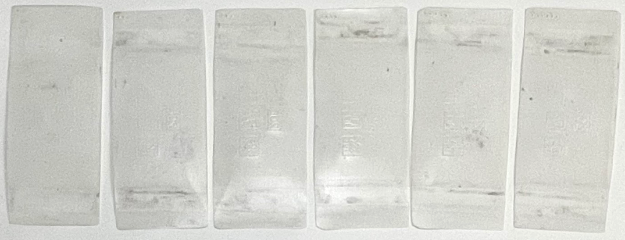


57 Dry Weathered Bioplastic, Front, Samples 1-6


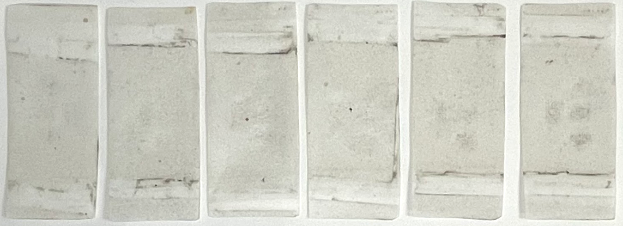


58 Dry Weathered Bioplastic, Back, Samples 1-6


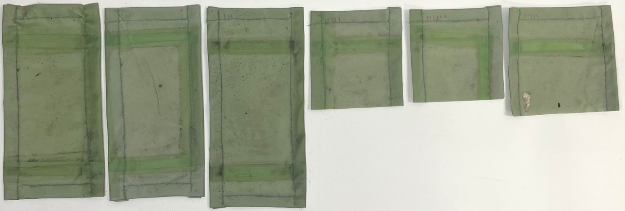


59 Dry Weathered Tent, Front, Samples 1-6


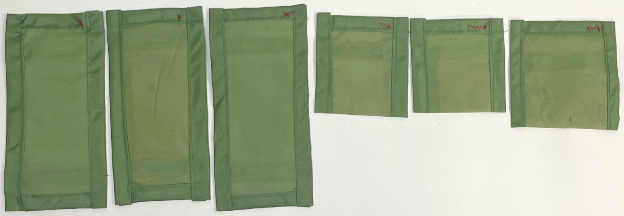


60 Dry Weathered Tent, Back, Samples 1-6

## 2.3 Items placed into tanks with deionized (DI) water


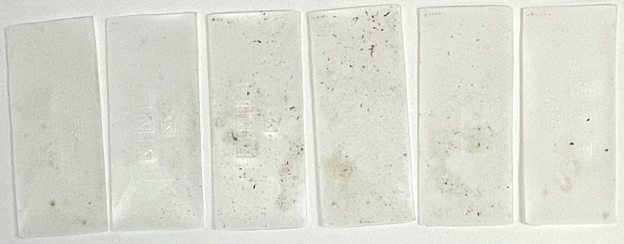


61 DI Weathered Bioplastic, Front, Samples 1-6


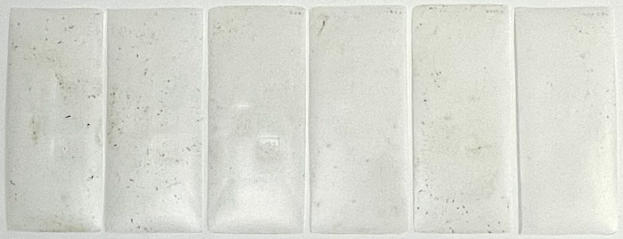


62 DI Weathered Bioplastic, Back, Samples 1-6


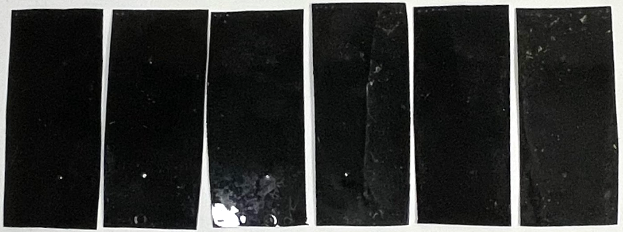


63 DI Weathered Black To-Go, Front, Samples 1-6


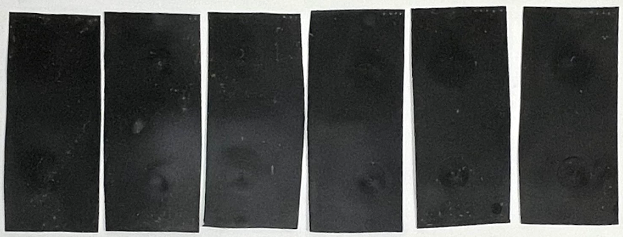


64 DI Weathered Black To-Go, Back, Samples 1-6

# Tumbled items

## 3.1 Pristine items after tumbling


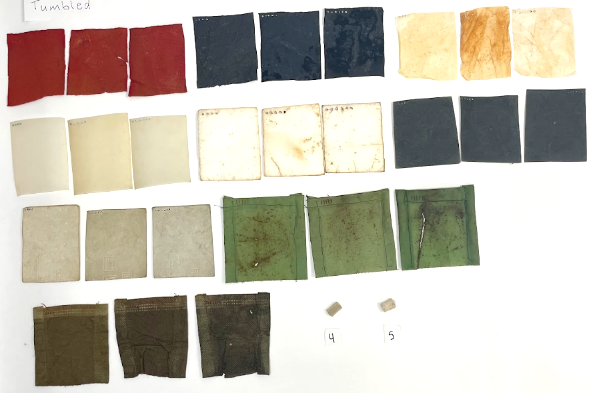


65 Tumbled Pristine, All Plastics, Samples 4-6


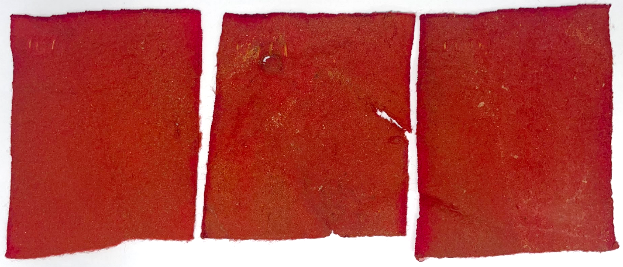


66 Tumbled Pristine Blanket, Front, Samples 4-6


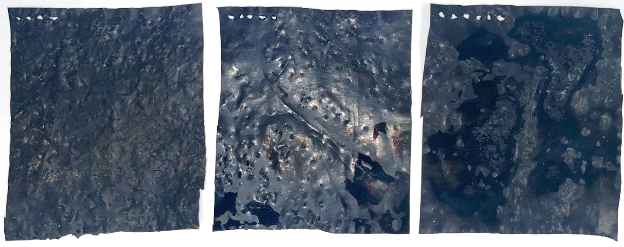


67 Tumbled Pristine Black Bag, Front, Samples 4-6


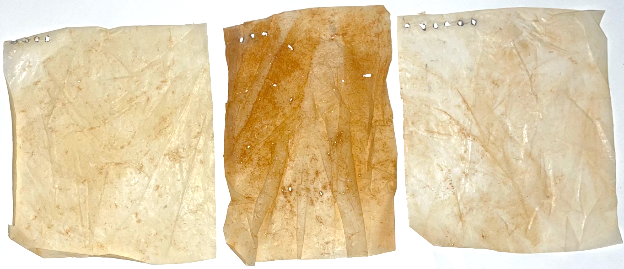


68 Tumbled Pristine White Bag, Front, Samples 4-6


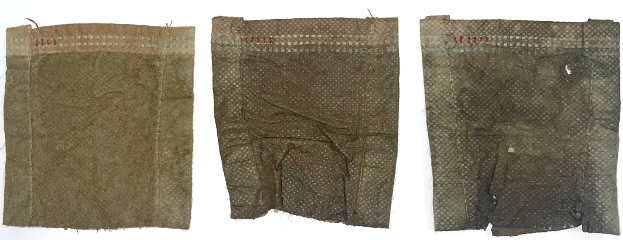


69 Tumbled Pristine Mask, Front, Samples 4-6


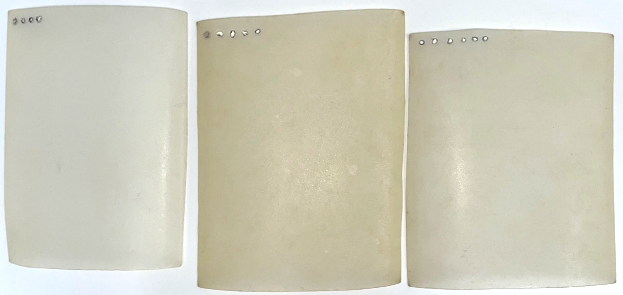


70 Tumbled Pristine Water Bottle, Front, Samples 4-6


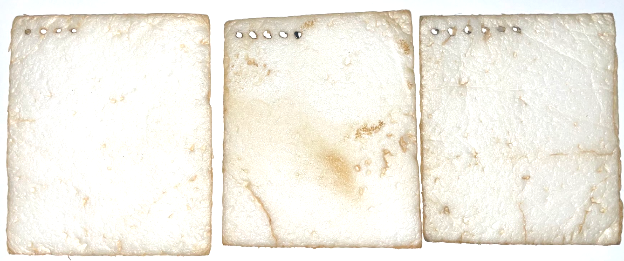


71 Tumbled Pristine Styrofoam, Front, Samples 4-6


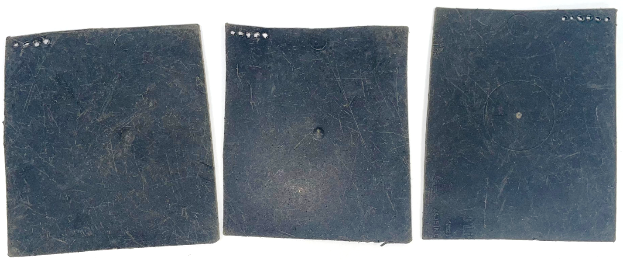


72 Tumbled Pristine Black To-Go, Front, Samples 4-6


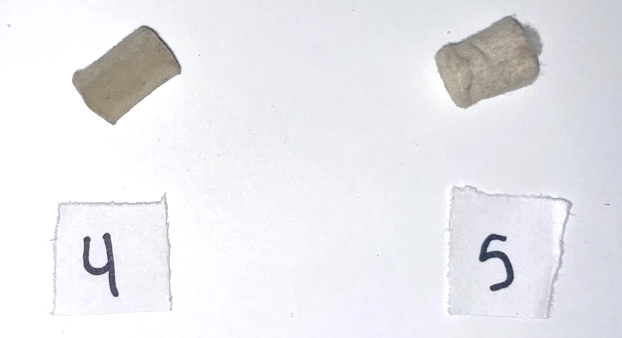


73 Tumbled Pristine Cigarette Butts, Samples 4-5


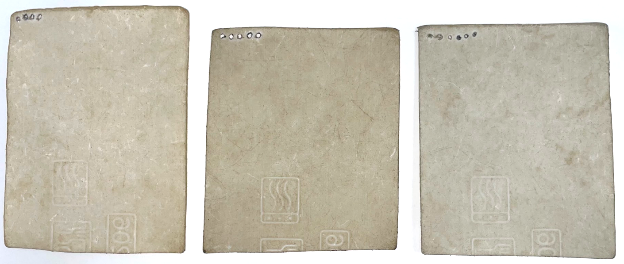


74 Tumbled Pristine Bioplastic, Front, Samples 4-6


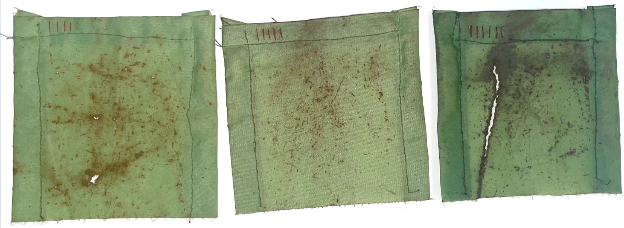


75 Tumbled Pristine Tent, Front, Samples 4-6

## Wet weathered items after tumbling


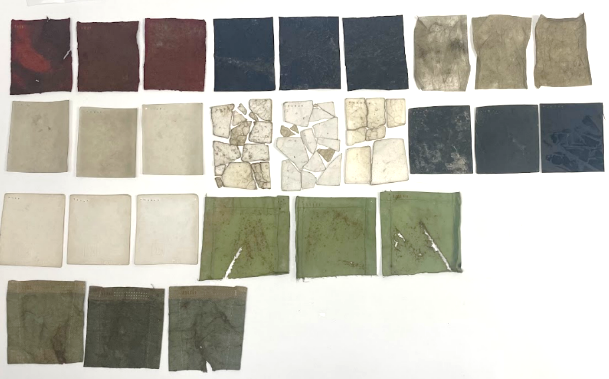


76 Tumbled Wet Weathered, All plastics except cigarette butts, Samples 4-6


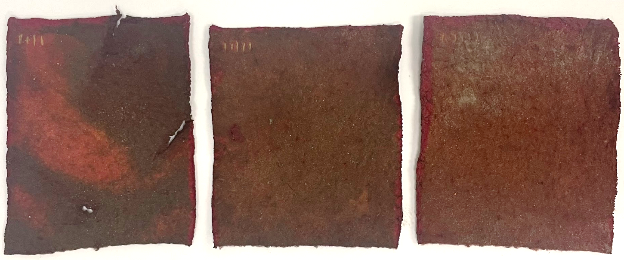


77 Tumbled Wet Blanket, Front, Samples 4-6


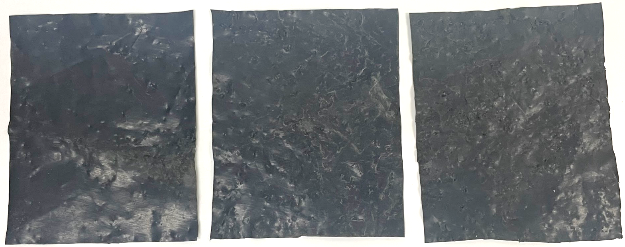


78 Tumbled Wet Black Bag, Front, Samples 4-6


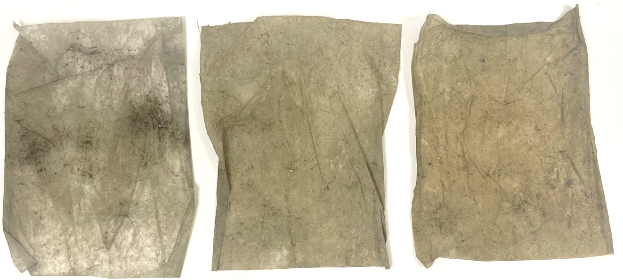


79 Tumbled Wet Weathered White Bag, Front, Samples 4-6


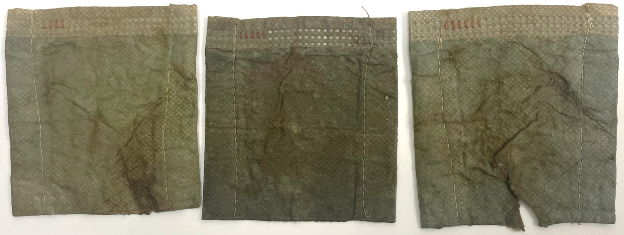


80 Tumbled Wet Weathered Mask, Front, Samples 4-6


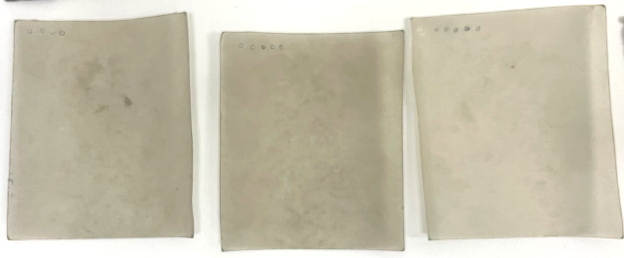


81 Tumbled Wet Weathered Water Bottle, Front, Samples 4-6


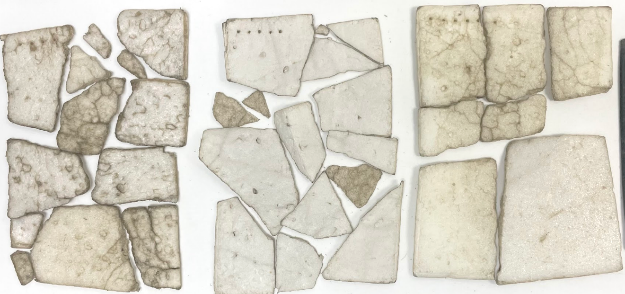


82 Tumbled Wet Weathered Styrofoam, Front, Samples 4-6


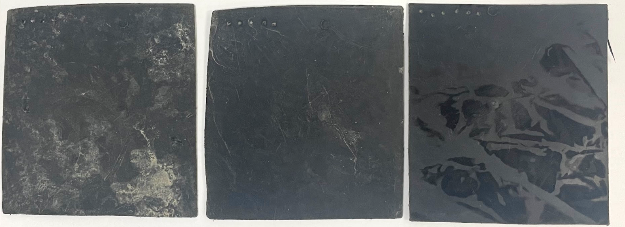


83 Tumbled Wet Weathered Black To-Go, Front, Samples 4-6


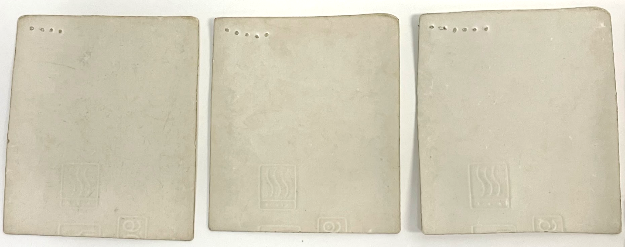


84 Tumbled Wet Weathered Bioplastic, Front, Samples 4-6


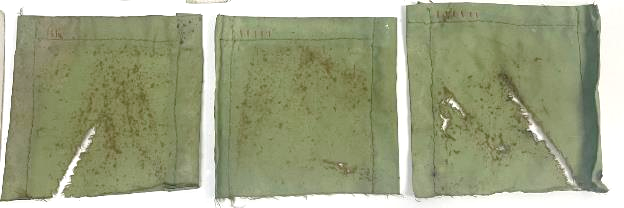


85 Tumbled Wet Weathered Tent, Front, Samples 4-6

## Dry weathered items after tumbling


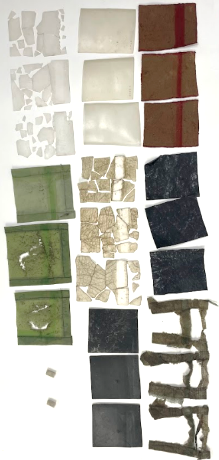


86 Tumbled Dry Weathered, All Plastics, Samples 4-6


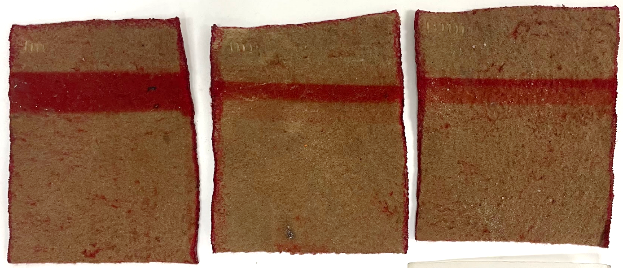


87 Tumbled Dry Weathered Blanket, Front, Samples 4-6


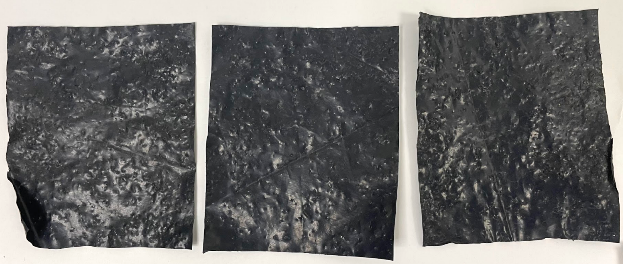


88 Tumbled Dry Weathered Black Bag, Front, Samples 4-6

No white bag


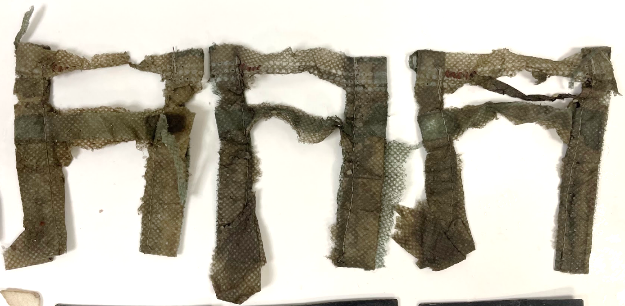


89 Tumbled Dry Weathered Mask, Front, Samples 4-6


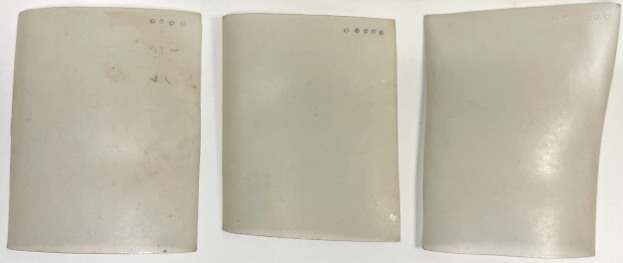


90 Tumbled Dry Weathered Water Bottle, Back, Samples 4-6


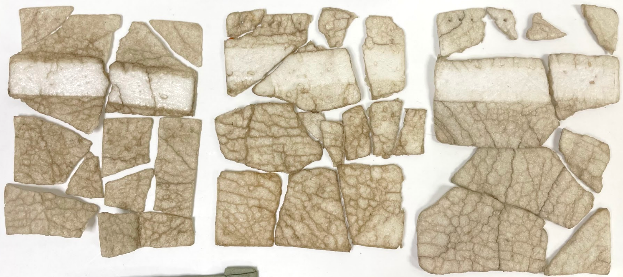


91 Tumbled Dry Weathered Styrofoam, Front, Samples 4-6


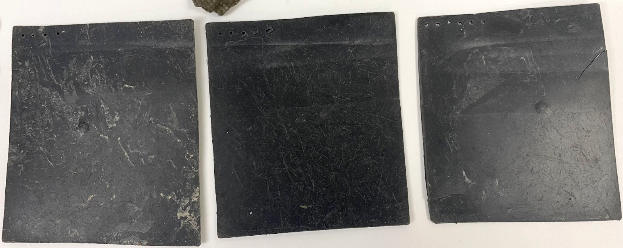


92 Tumbled Dry Weathered Black To-Go, Front, Samples 4-6


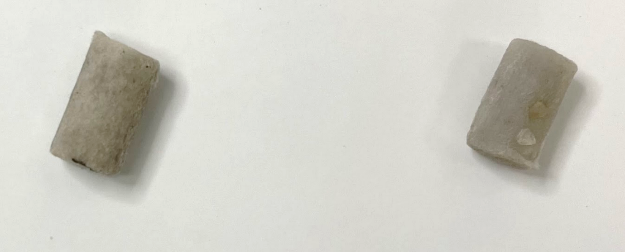


93 Tumbled Dry Weathered Cigarette Butts


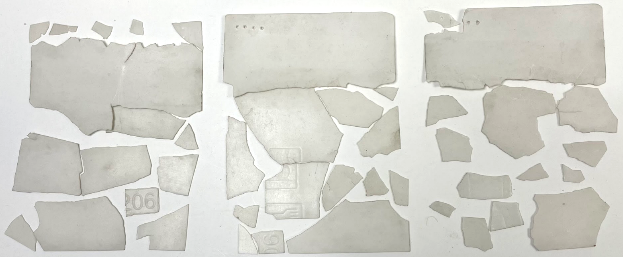


94 Tumbled Dry Weathered Bioplastic, Front, Samples 4-6


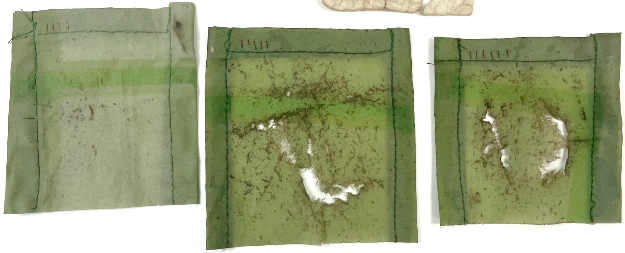


95 Tumbled Dry Weathered Tent, Front, Samples 4-6
