# Supplementary material for: Marine Debris in River Margins: Wet and Dry Weathering Effects on the Fragmentation and Degradation of Discarded Plastic
Source: Research Square preprint supplement (doi:10.21203/rs.3.rs-7303205/v1), 2025-08-19
Supplement: Supplementary file 3 [file c2a3d0d8da649b7af287fd03.docx]

**Supplemental Information - 3**

MARINE DEBRIS IN RIVER MARGINS: WET AND DRY WEATHERING EFFECTS ON THE FRAGMENTATION AND DEGRADATION OF DISCARDED PLASTIC

Natalie Mladenov1*, Ella Knight1, Alexi Olney2, Fernando Wakida3, Teresita de Jesus Piñon-Colin3, George Youssef4, Alicia Kinoshita1

1 Department of Civil, Construction, and Environmental Engineering, 5500 Campanile Drive, San Diego State University, San Diego, CA, USA

2 Department of Statistics, 5500 Campanile Drive, San Diego State University, San Diego, CA, USA

3 Universidad Autónoma de Baja California, Calzada Universidad 14418, Parque Industrial Internacional Tijuana, C.P. 22390 Tijuana, Baja California, Mexico

4 Department of Mechanical Engineering, 5500 Campanile Drive, San Diego State University, San Diego, CA, USA

* Corresponding author: nmladenov@sdsu.edu

This document contains:

- Supplemental Tables S3-1 to S3-10 showing FTIR-ATR bands and wavenumbers of polymer reference material and the pristine (unweathered) samples.
- Supplemental Figures S3-1 to S3-20 showing FTIR-ATR spectra under pristine and weathered conditions.

**Table S3-1**. Main bands and wavenumber identified of pristine cigarette filter sample compare to reference cellulose acetate material.

| **Functional group or bond** | **Reference wavenumber (cm-1) Cellulose acetate (CA)** | **Wavenumber of pristine cigarette filter (cm-1).** |
| --- | --- | --- |
| **C-H stretching** | 2900 | 2951, 2880 |
| **C=O ester** | 1750-1730 | 1737 |
| **CH3 flexion** | 1450 y 1375 | 1450 y 1365 |
| **C-O symmetrical** | 1300-1000 | 1031 |
| **CH2 flexion** | 1465 | 1433 |
| **Asymmetric stretch**  **C-O- C=O** | 1300-1000 | 1217 |
| **Swinging CH2** | 720 | 718 |
| **Swinging C=0** |  | 686 |
| -OH Hydroxyl | 3750-3300 | 3543 weak signal |
| C= O Carbonyl acid | 1725-1700 | 1644 weak signal |
| C-O unsaturated | 1200-1000 | 1031 |

**
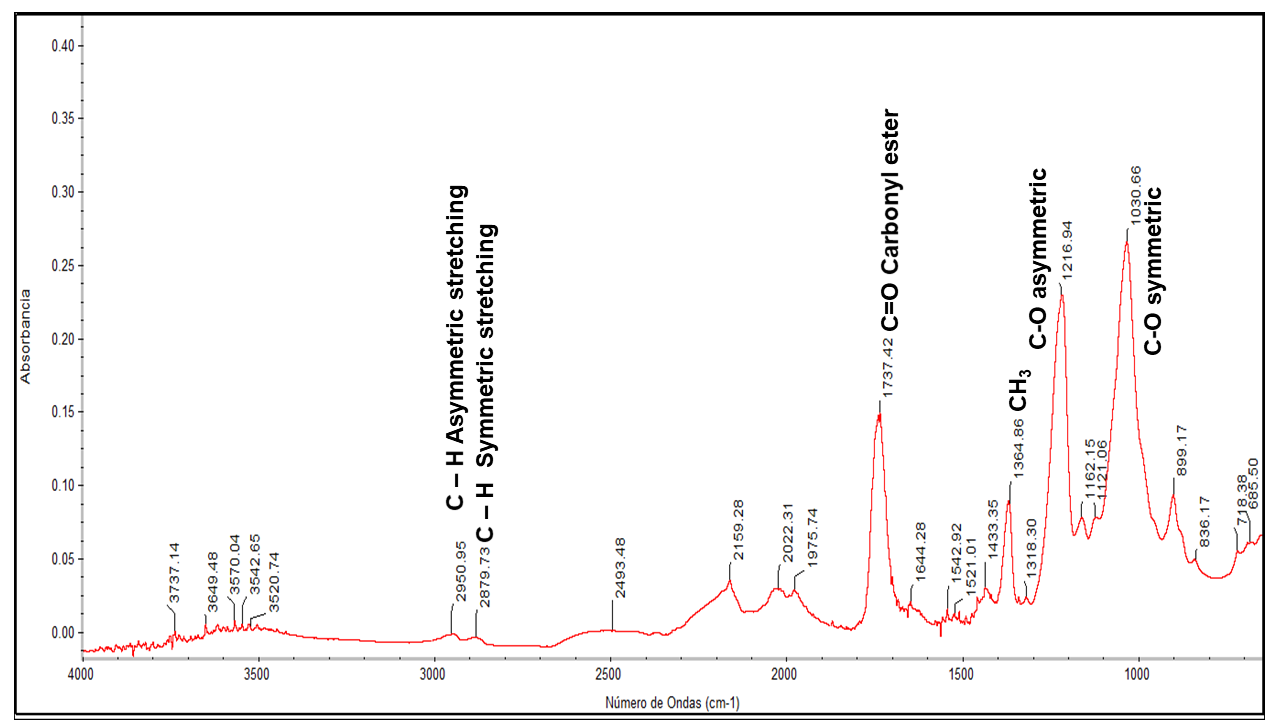
**

**Figure S3-1.** FTIR-ATR absorbance spectrum of pristine CA cigarette filter.

**
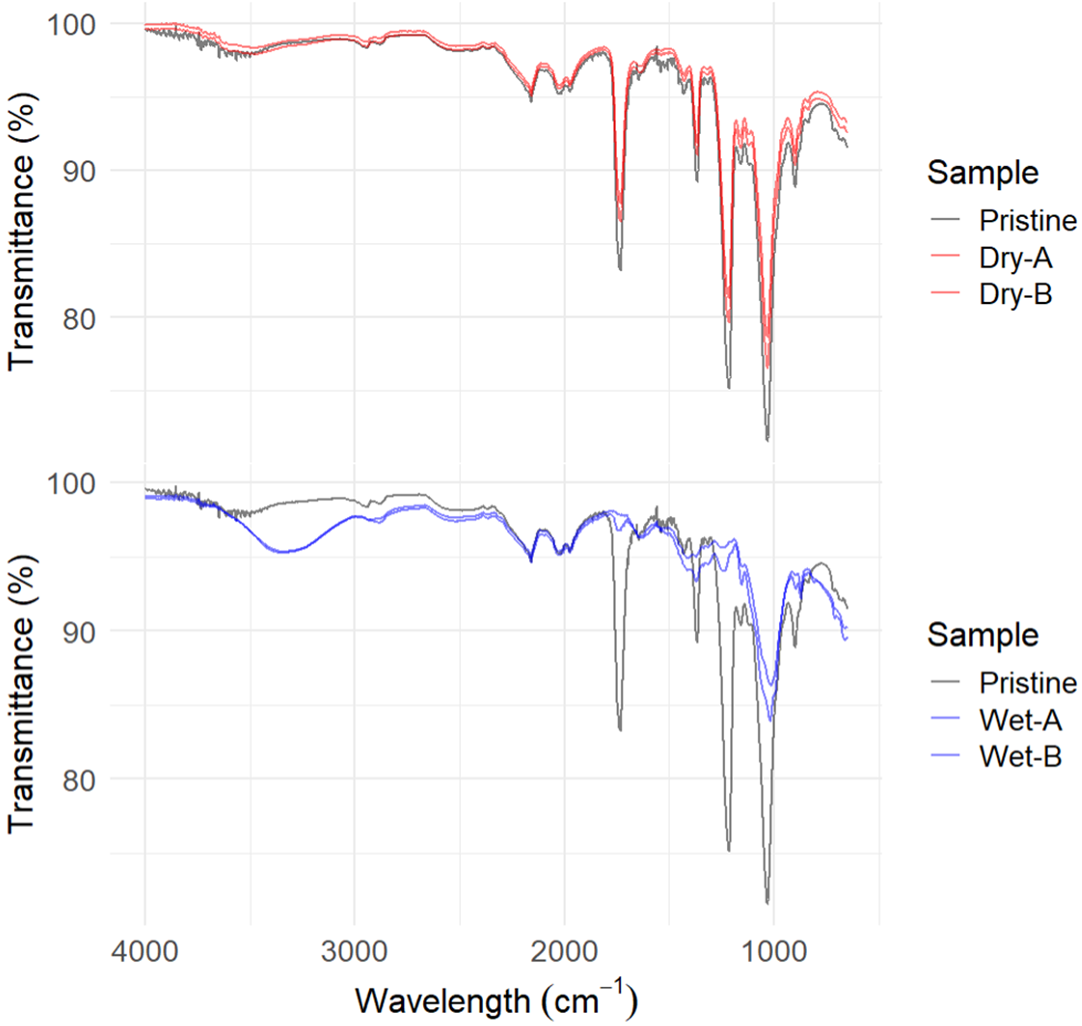
**

**Figure S3-2.** FTIR-ATR transmittance spectra of pristine, dry, and wet weathered CA cigarette filters.

**Table S3-2.** Main bonds and wavenumbers found in pristine blanket.

| **Functional group or bond.** | **Reference wavenumber (cm-1) for polyethylene terephthalate (PET)** | **Wavenumber of pristine blanket (cm-1)** |
| --- | --- | --- |
| -CH2-asymmetric and symmetric stretching | 3000-2850 | 2973, 2910 |
| =C-H aromatic stretch | 3150-3050 | 3100 weak signal |
| C=O ester | 1750-1705 | 1713 |
| C=C aromatic ring  C=C aromatic polyester | 1600 y 1475  1615, 1580 y 1505 | 1576 y 1455 |
| C-H asymmetric and symmetric in the plane | 1471, 1409 y 1340 | 1409 y 1337 |
| C-C(O)-O | 1260-1250 | 1239 |
| -O-C- | 1130-1120  1100-1090 | 1094 |
| C-H aromatic ring in the plane | 1016 y 970 | 1017 y 970 |
| C-H aromatic ring out of plane | 900-690 | 870 |
| C-H aromatic ring winging | 720 | 727 |
| CO2 | 2380 | 2380 |
| -OH Hydroxyl | 3750-3300 | ----- |
| C= O Carbonyl |  | ----- |
| C-O unsaturated | 1200-1000 | 1094 |

**
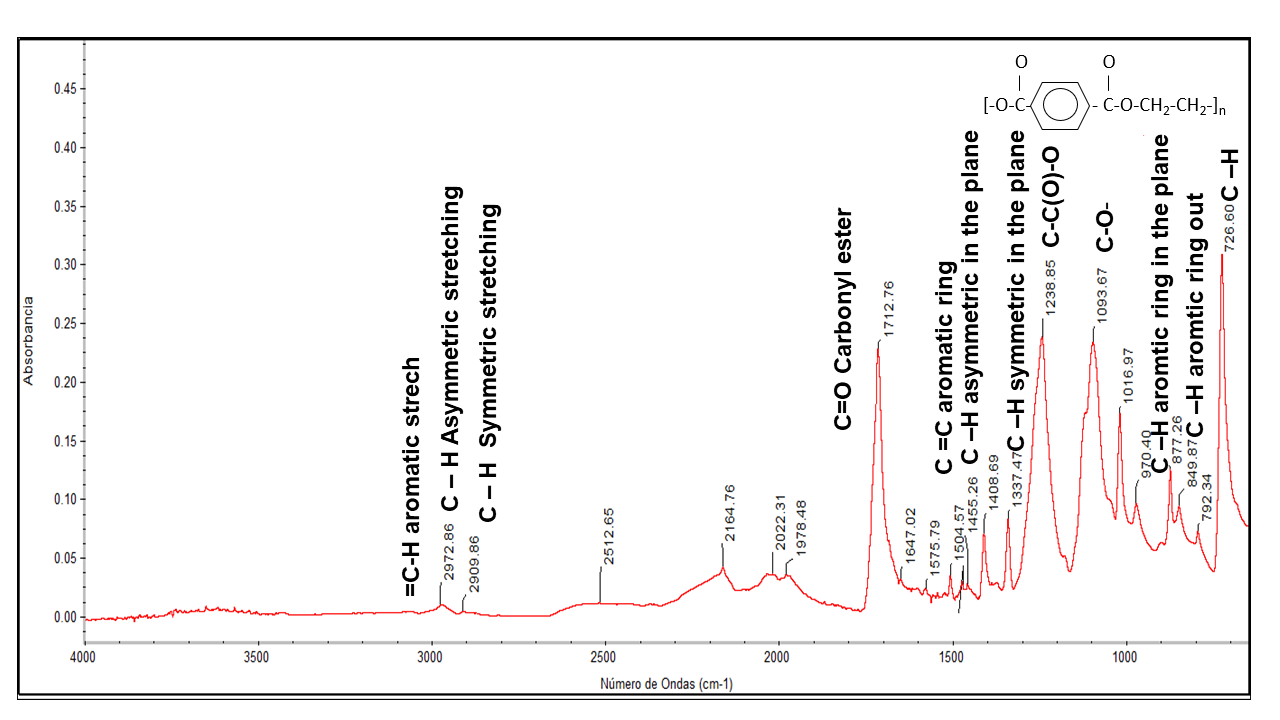
**

**Figure S3-3.** FTIR-ATR absorbance spectrum of pristine PET blanket.

**
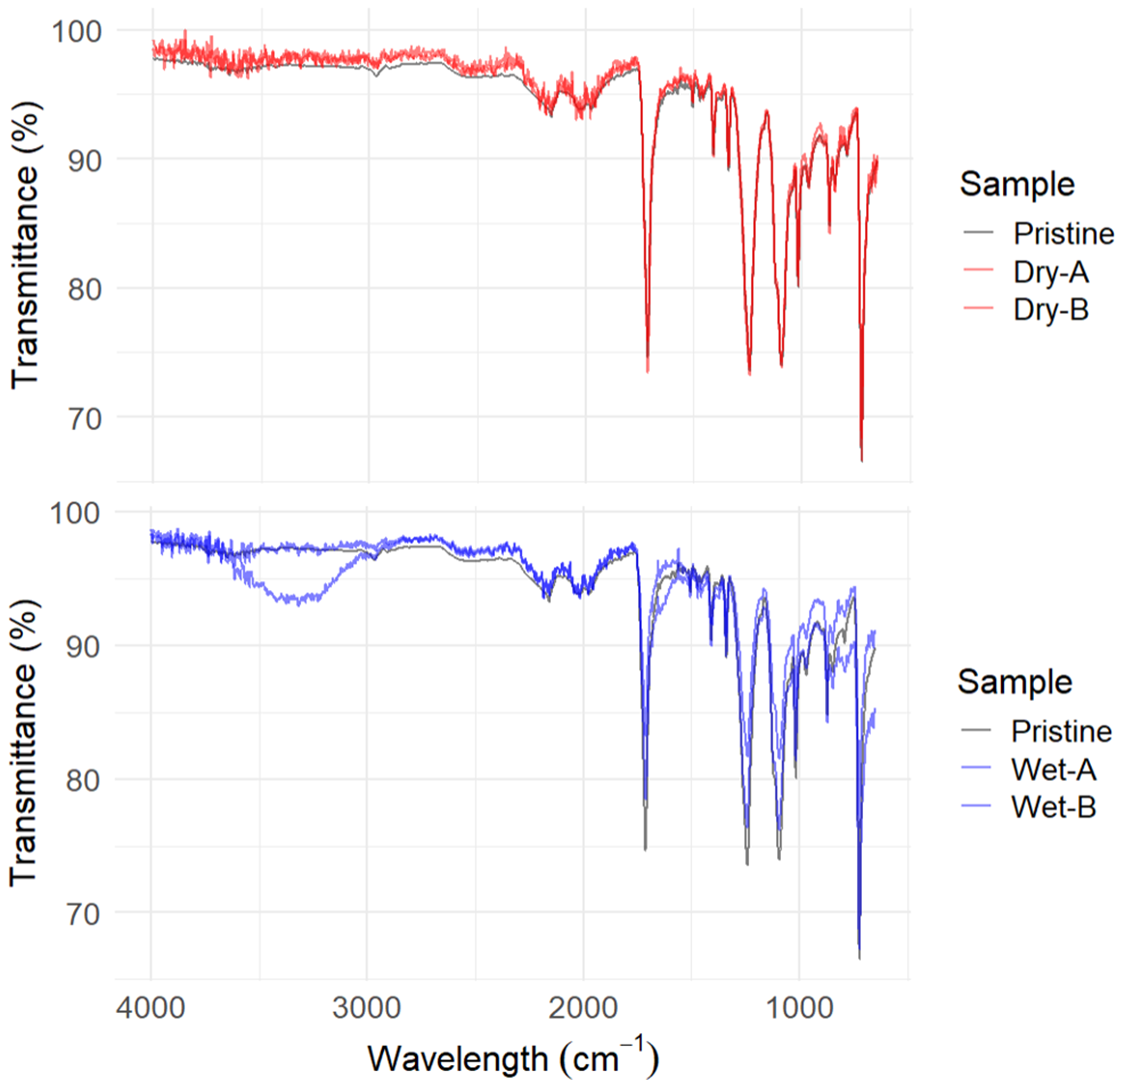
**

**Figure S3-4.** FTIR-ATR transmittance spectra of pristine, dry, and wet weathered PET blanket**.**

**Table S3-3.** Main bonds and wavenumbers found in pristine tent.

| **Functional group or bond.** | **Reference wavenumber (cm-1) for** **polyethylene terephthalate** | **Wavenumber of pristine tent (cm-1)** |
| --- | --- | --- |
| -CH2-asymmetric and symmetric stretching | 3000-2850 | 2965, 2915 |
| =C-H aromatic stretch | 3150-3050 | 3050 weak signal |
| C=O ester | 1750-1705 | 1716 |
| C=C aromatic ring  C=C aromatic polyester | 1600 y 1475  1615, 1580 y 1505 | 1576 y 1472 |
| C-H asymmetric and symmetric in the plane | 1471, 1409 y 1340 | 1411 y 1340 |
| C-C(O)-O | 1260-1250 | 1242 |
| -O-C- | 1130-1120  1100-1090 | 1098 |
| C-H aromatic ring in the plane | 1016 y 970 | 1017 y 968 |
| C-H aromatic ring out of plane | 900-690 | 872 |
| C-H aromatic ring winging | 720 | 727 |
| CO2 | 2380 | 2491 |
| -OH Hydroxyl | 3750-3300 | ----- |
| C= O Carbonyl |  | 1607 |
| C-O unsaturated | 1200-1000 | 1099 |

**
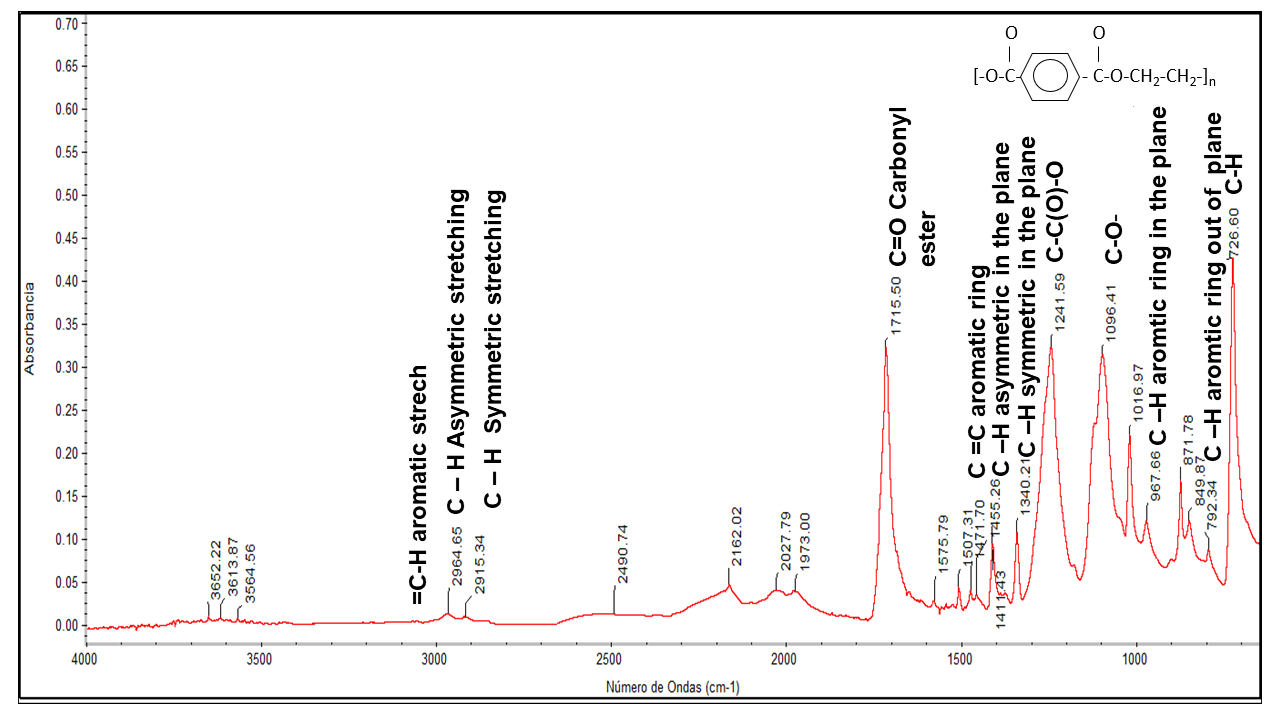
**

**Figure S3-5.** FTIR-ATR absorbance spectrum of pristine PET tent.

**
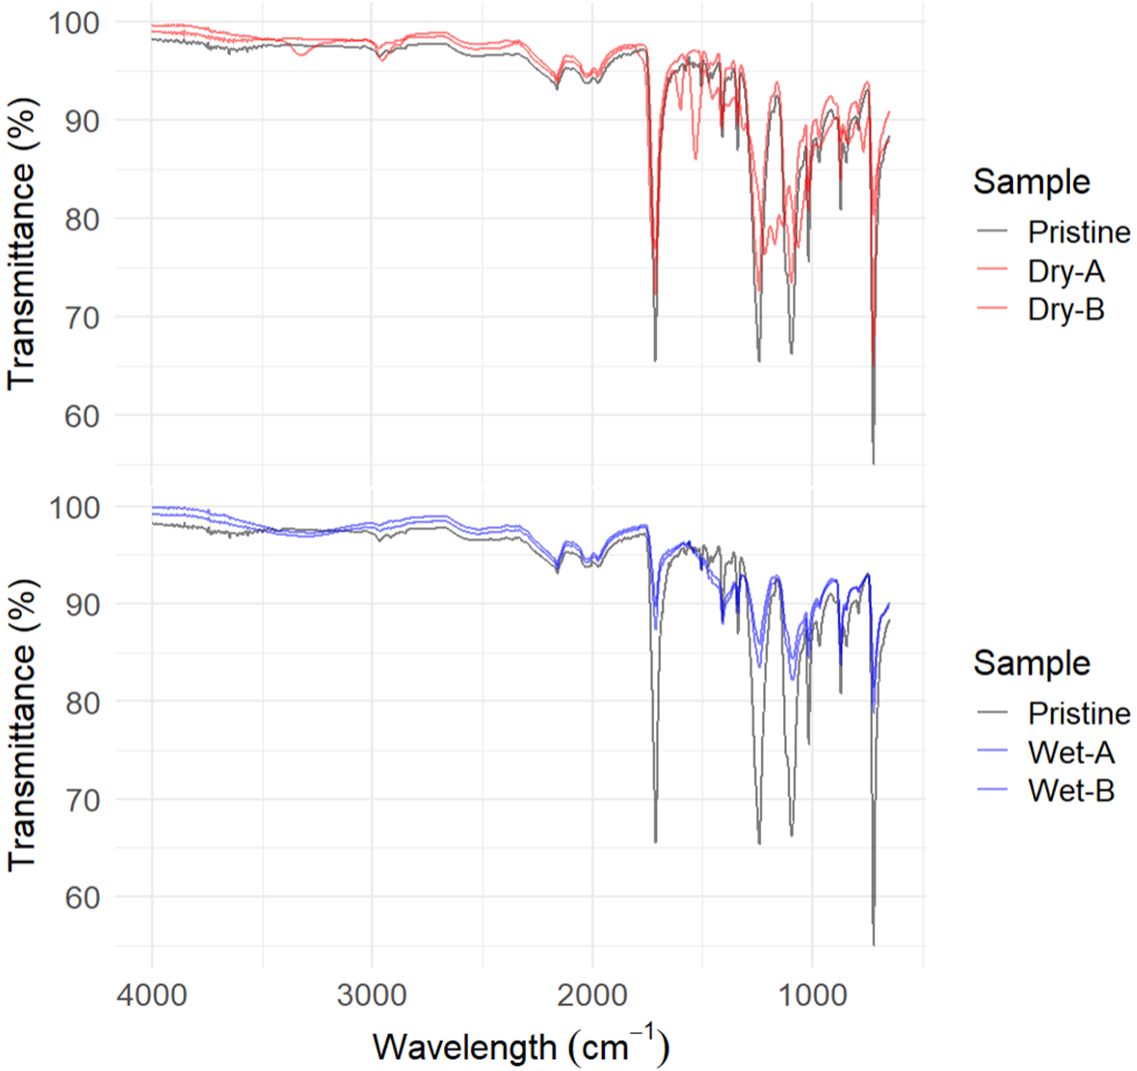
**

**Figure S3-6.** FTIR-ATR transmittance spectra of pristine, dry, and wet weathered PET tent**.**

**Table S3-4.** Main bonds and wavenumbers found in pristine medical mask.

| **Functional group or bond.** | **Reference wavenumber (cm-1) for polypropylene (PP).** | **Wavenumber of** p**ristine mask (cm-1).** |
| --- | --- | --- |
| C-H stretching | 2900 | 2954, 2915, 2836 |
| C-C stretching | 1350-1450 | 1376 |
| CH3 bending | 1450 y 1375 | 1461 y 1376 |
| -OH Hydroxyl | 3750-3300 | -------- |
| C= O Carbonyl |  | 1653 |
| C-O unsaturated | 1200-1000 | 1099 weak signal |

**
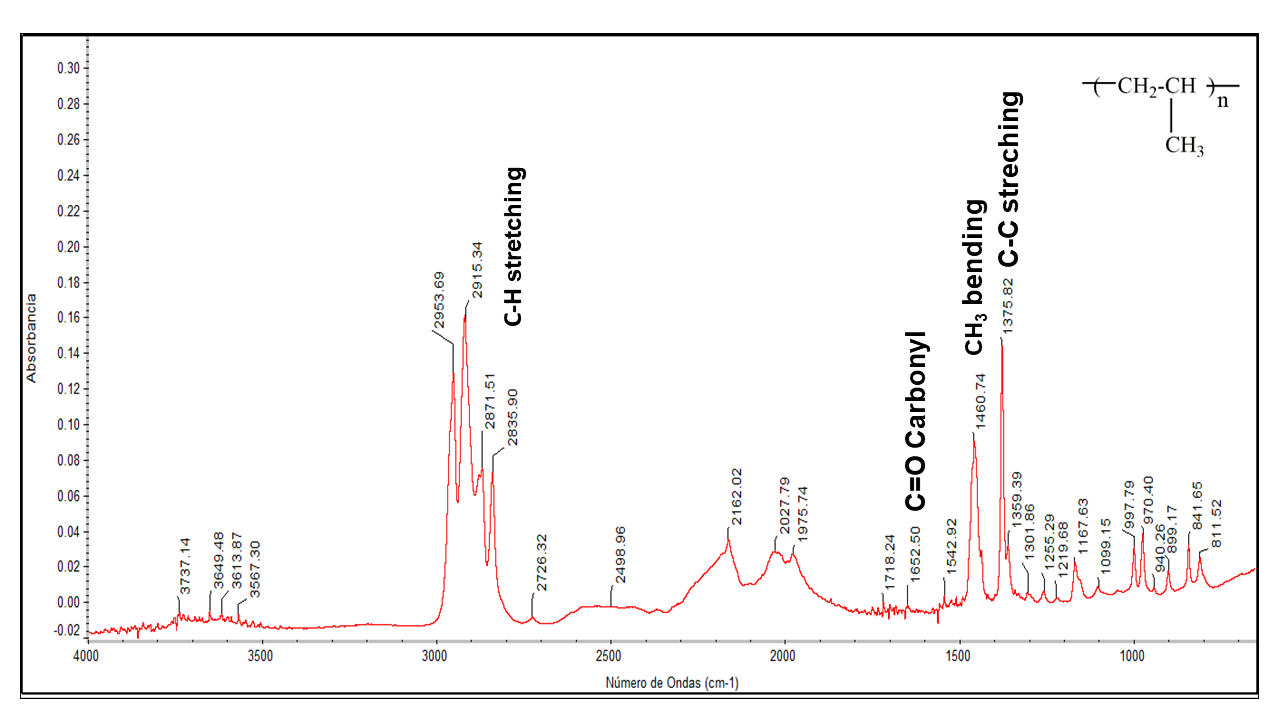
**

**Figure S3-7.** FTIR-ATR absorbance spectrum of pristine PP medical mask**.**

**
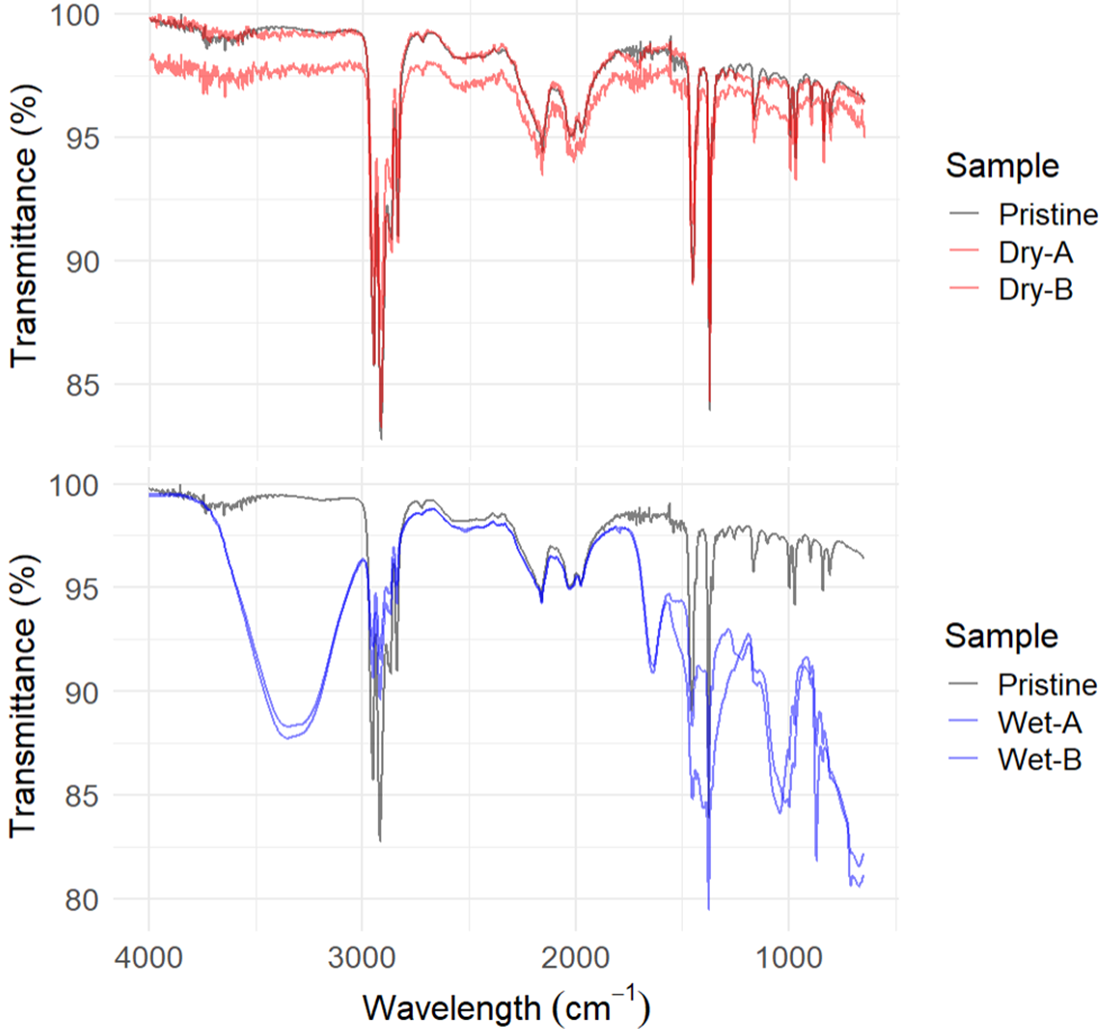
**

**Figure S3-8.** FTIR-ATR transmittance spectra of pristine, dry, and wet weathered PP medical mask**.**

**Table S3-5.** Main bonds and wavenumbers found in pristine thick bag.

| **Functional group or bond.** | **Reference wavenumber (cm-1) for polyethylene (PE).** | **Wavenumber of pristine thick bag (black film) (cm-1).** |
| --- | --- | --- |
| CH stretching | 2965-2915 | 2915 |
| CH stretching | 2865-2840 | 2850 |
| CH2 in the plane | 1470-1465 | 1469 |
| CH deformation out of plane | 720-710 | 724 |
| -OH Hydroxyl | 3750-3300 | ------ |
| C= O Carbonyl |  | 1647 weak signal |
| C-O unsaturated | 1200-1000 | 1014 |

**
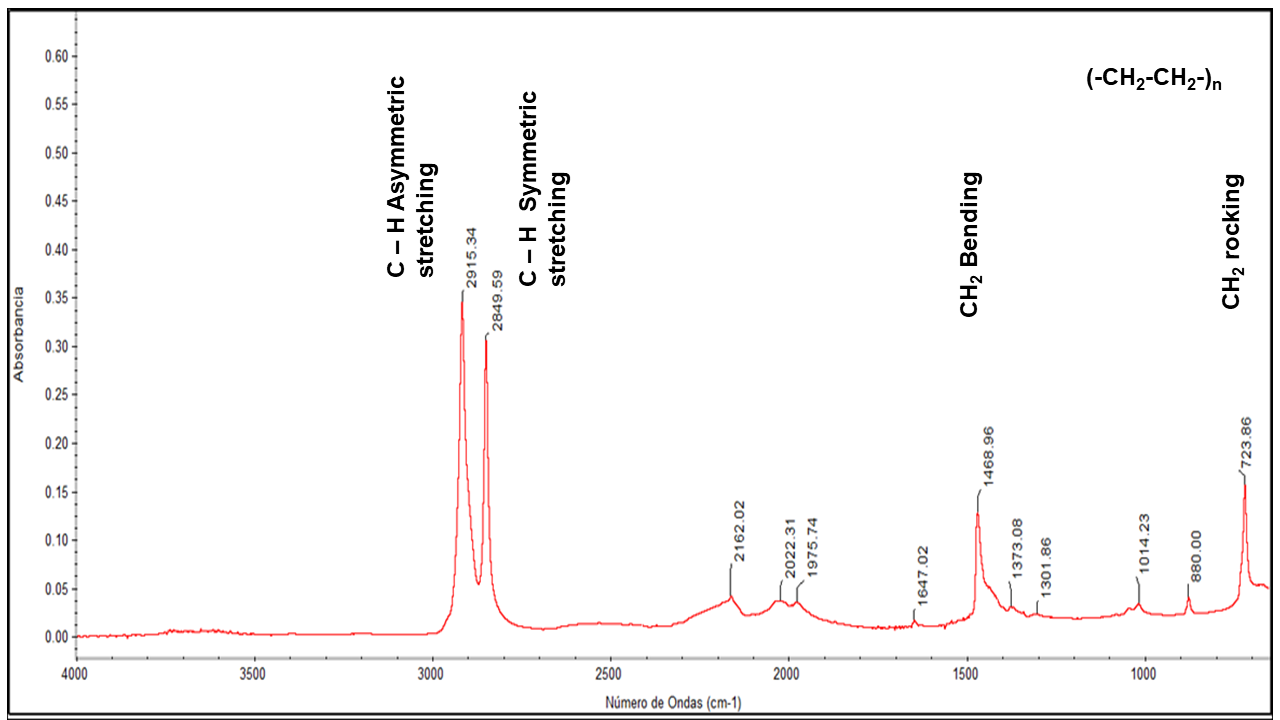
**

**Figure S3-9.** FTIR-ATR absorbance spectrum of pristine LDPE thick bag.

**
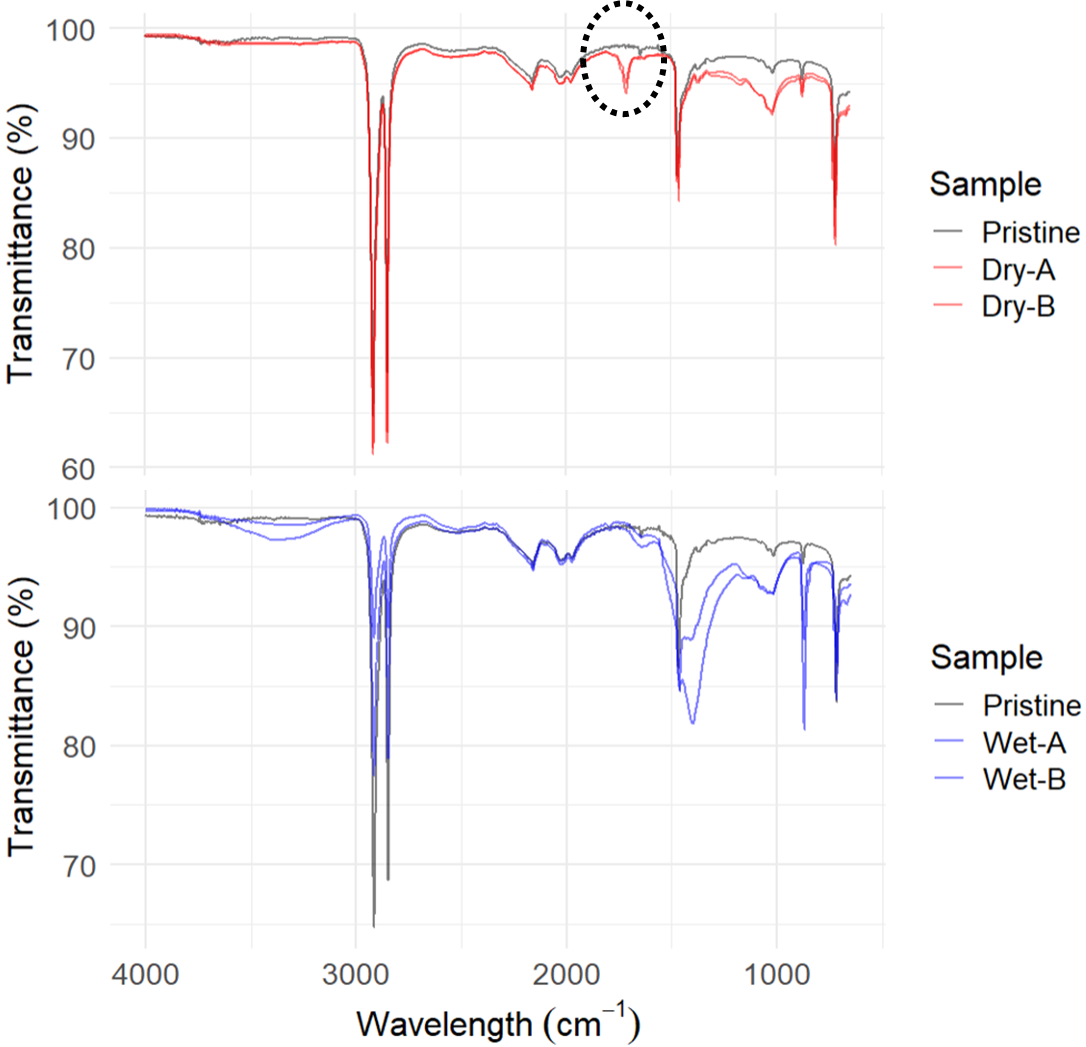
**

**Figure S3-10.** FTIR-ATR transmittance spectra of pristine, dry, and wet weathered LDPE thick bag.C-O carbonyl area is circled with dashed line.

**Table S3-6.** Main bonds and wavenumbers found in pristine thin bag.

| **Functional group or bond.** | **Reference wavenumber (cm-1) for polyethylene (PE).** | **Wavenumber of pristine thin bag (cm-1).** |
| --- | --- | --- |
| CH stretching | 2965-2915 | 2918 |
| CH stretching | 2865-2840 | 2852 |
| CH2 in the plane | 1470-1465 | 1474 |
| CH deformation out of plane | 720-710 | 721 |
| -OH Hydroxyl | 3750-3300 | ------ |
| C= O Carbonyl |  | ------- |
| C-O unsaturated | 1200-1000 | 1044 |


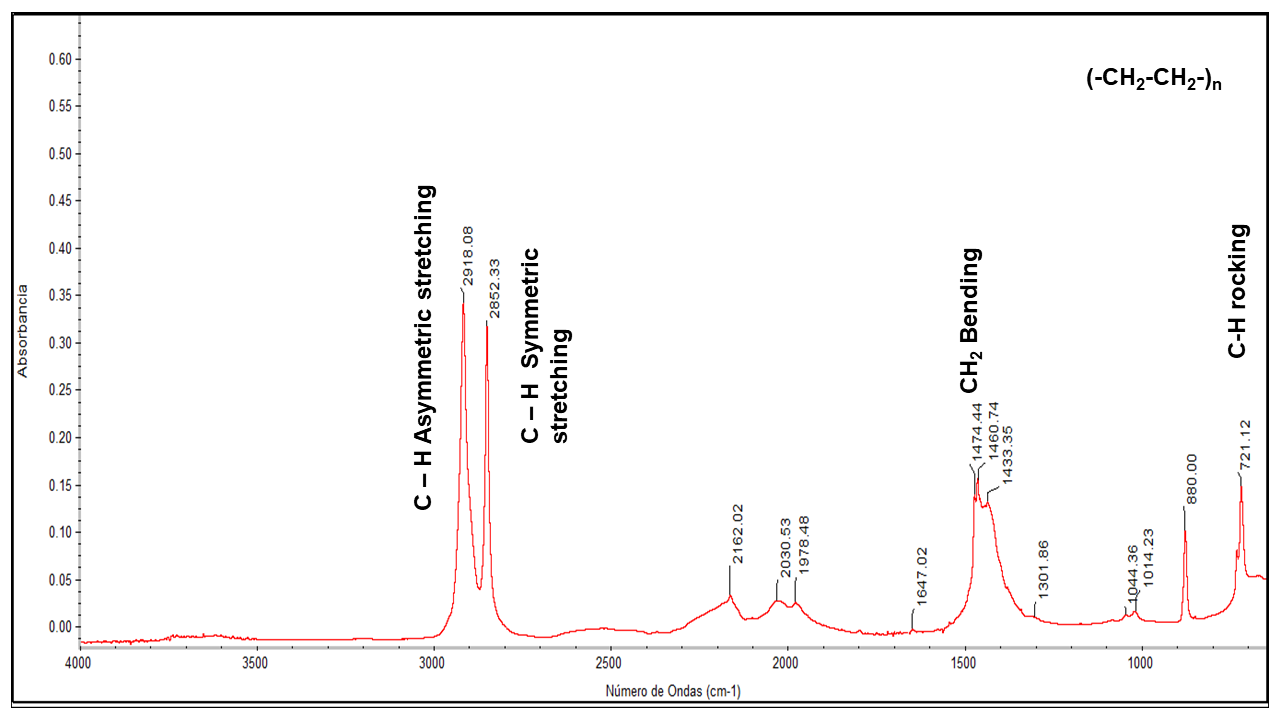


**Figure S3-11.** FTIR-ATR absorbance spectrum of pristine LDPE thin bag.

**
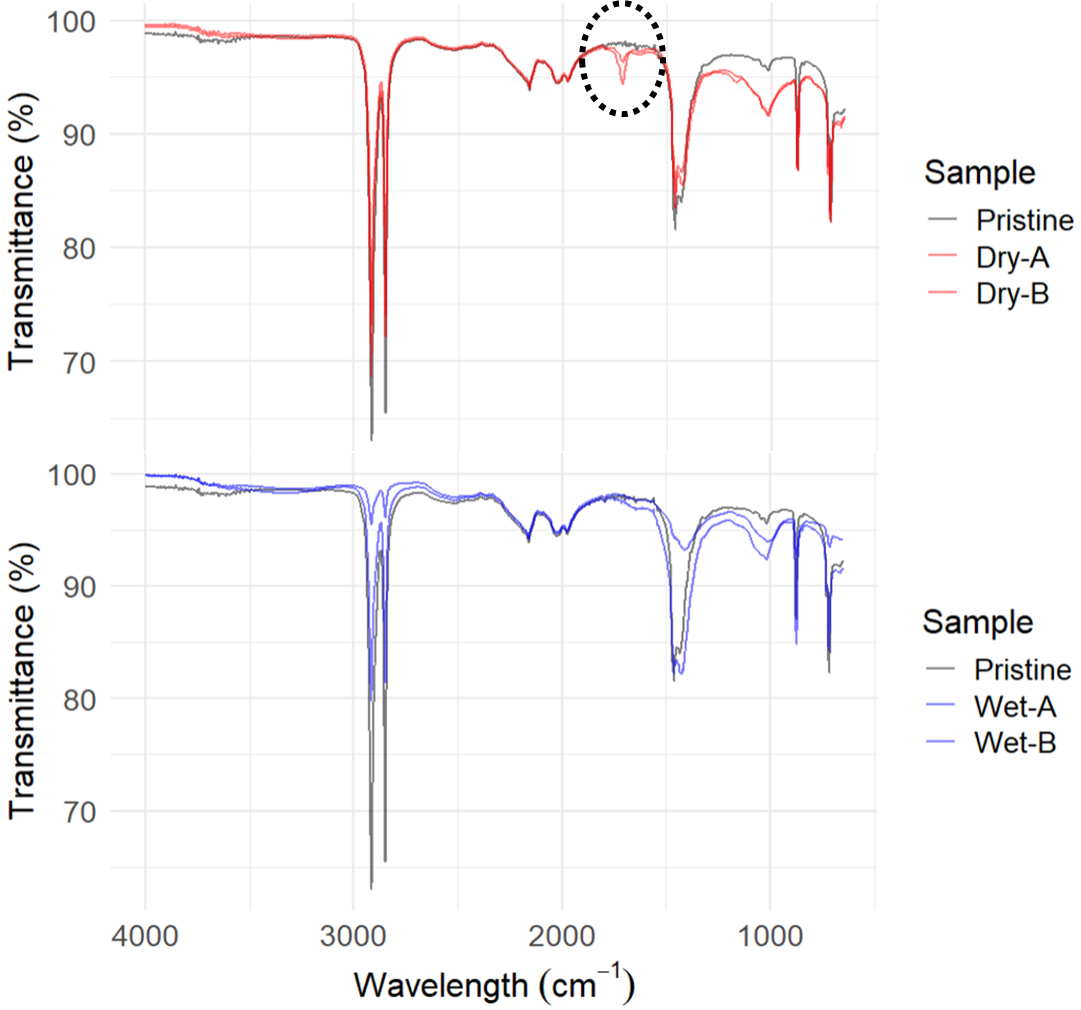
**

**Figure S3-12.** FTIR-ATR transmittance spectra of pristine, dry, and wet weathered LDPE thin bag**.** C-O carbonyl area is circled with dashed line.

**Table S3-7.** Main bonds and wavenumbers found in pristine water bottle.

| **Functional group or bond.** | **Reference wavenumber (cm-1) for polyethylene terephthalate** | **Wavenumber of pristine water bottle (cm-1)** |
| --- | --- | --- |
| -CH2-asymmetric and symmetric stretching | 3000-2850 | 2970, 2910 |
| =C-H aromatic stretch | 3150-3050 | 3100 weak signal |
| C=O ester | 1750-1705 | 1716 |
| C=C aromatic ring  C=C aromatic polyester | 1600 y 1475  1615, 1580 y 1505 | 1576 y 1469 |
| C-H asymmetric and symmetric in the plane | 1471, 1409 y 1340 | 1406 y 1338 |
| C-C(O)-O | 1260-1250 | 1247 |
| -O-C- | 1130-1120  1100-1090 | 1096 |
| C-H aromatic ring in the plane | 1016 y 970 | 1017 y 970 |
| C-H aromatic ring out of plane | 900-690 | 872 |
| C-H aromatic ring winging | 720 | 727 |
| CO2 | 2380 | 2370 weak signal |
| -OH Hydroxyl | 3750-3300 | ---- |
| C= O Carbonyl ester |  | 1716 |
| C-O unsaturated | 1200-1000 | 1096 |

**
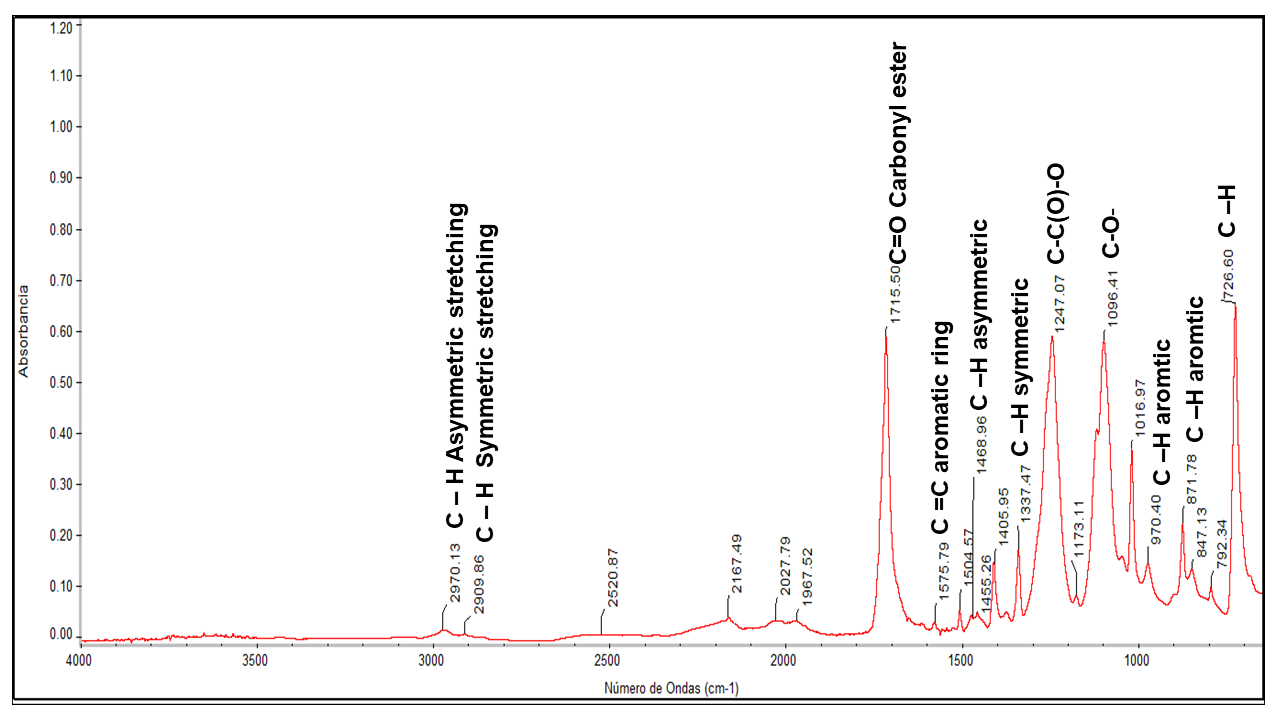
**

**Figure S3-13.** FTIR-ATR absorbance spectrum of pristine PET water bottle.

**
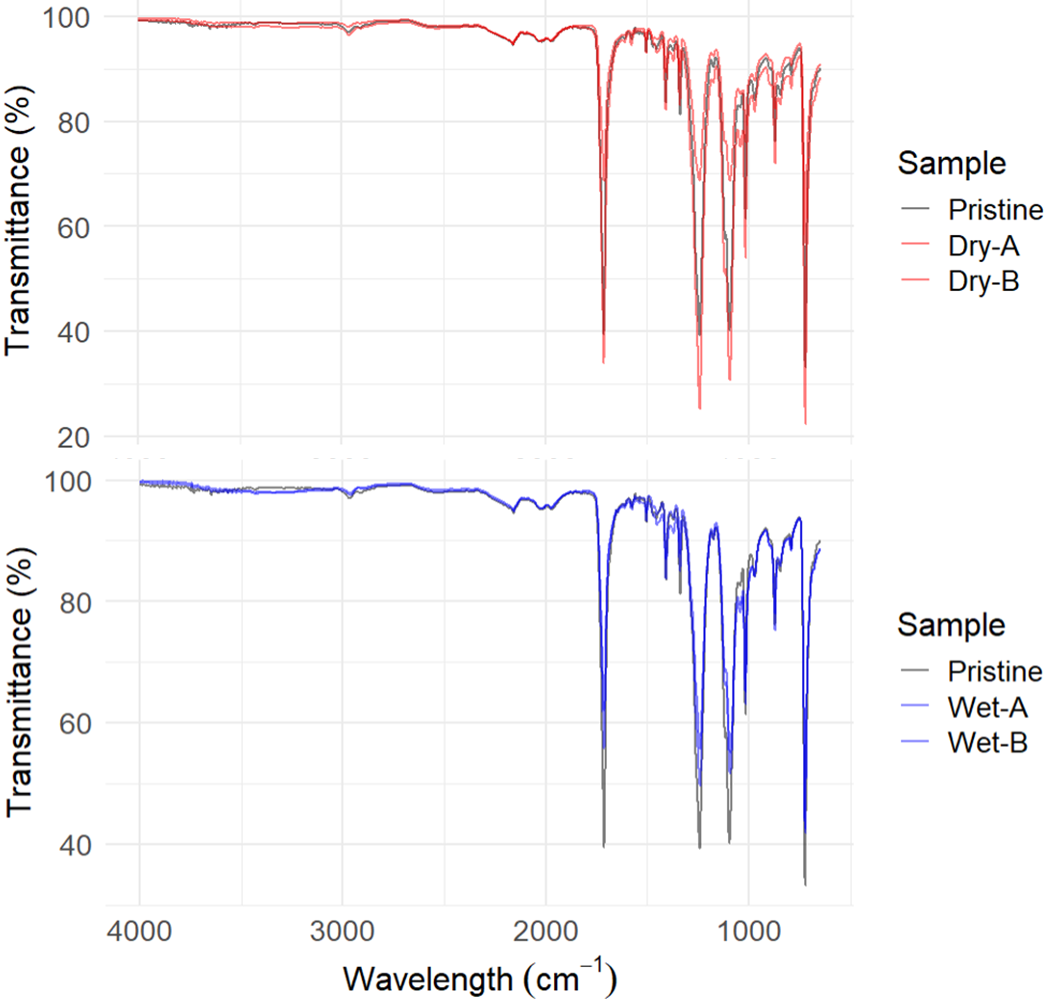
**

**Figure S3-14.** FTIR-ATR transmittance spectra of pristine, dry, and wet weathered PET water bottle**.**

**Table S3-8.** Main bonds and wavenumbers found in pristine Styrofoam food container.

| **Functional group or bond.** | **Reference wavenumber (cm-1) for polystyrene (PS).** | **Wavenumber of pristine Styrofoam (cm-1).** |
| --- | --- | --- |
| C-H of the aromatic ring | 3150-3050 | 3025 |
| CH asymmetric stretch | 3000-2850 | 2916, 2844 |
| C-C aromatic compounds | 1600-1450 | 1600 |
| -CH2 of bending | 1570 | 1491 |

**
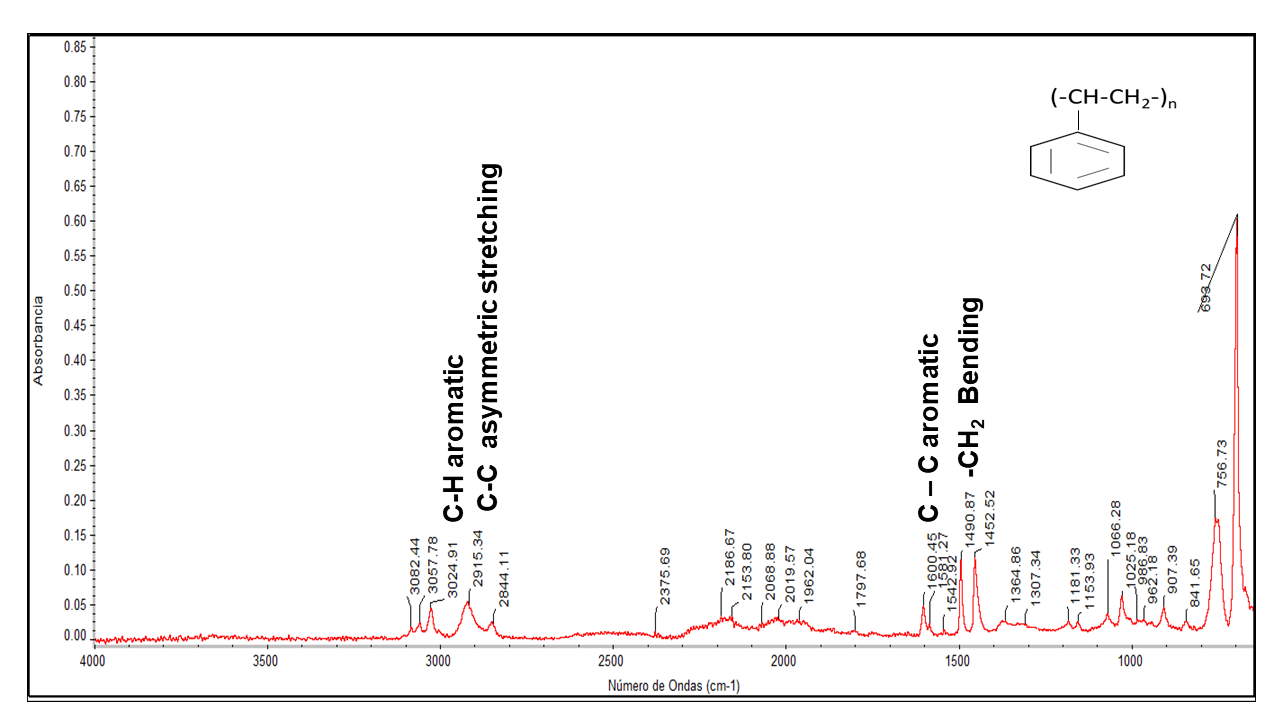
**

**Figure S3-15.** FTIR-ATR absorbance spectrum of pristine PS food container.

**
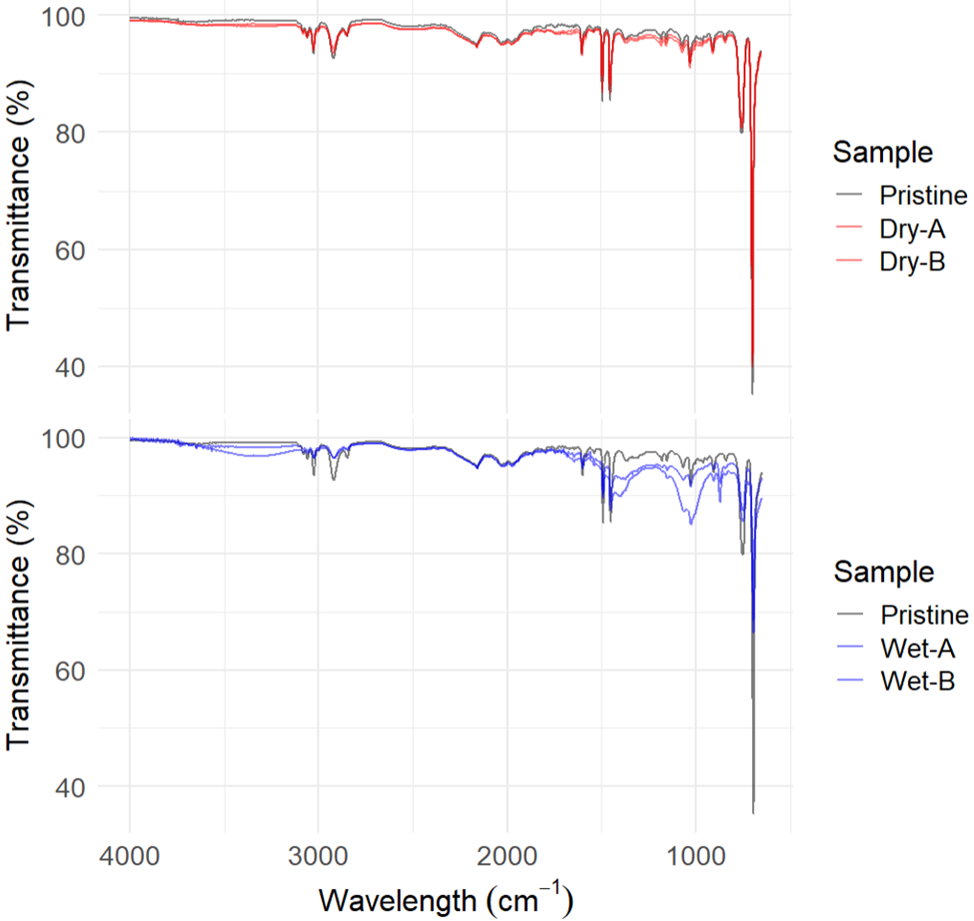
**

**Figure S3-16.** FTIR-ATR transmittance spectra of pristine, dry, and wet weathered PS food container.

**Table S3-9.** Main bonds and wavenumbers found in pristine PP food container.

| **Functional group or bond.** | **Reference wavenumber (cm-1) for polypropylene (PP).** | **Wavenumber of pristine PP food container (cm-1).** |
| --- | --- | --- |
| C-H stretching | 2900 | 2951, 2915, 2839 |
| C-C stretching | 1350-1450 | 1381 |
| CH3 bending | 1450 y 1375 | 1458 y 1381 |


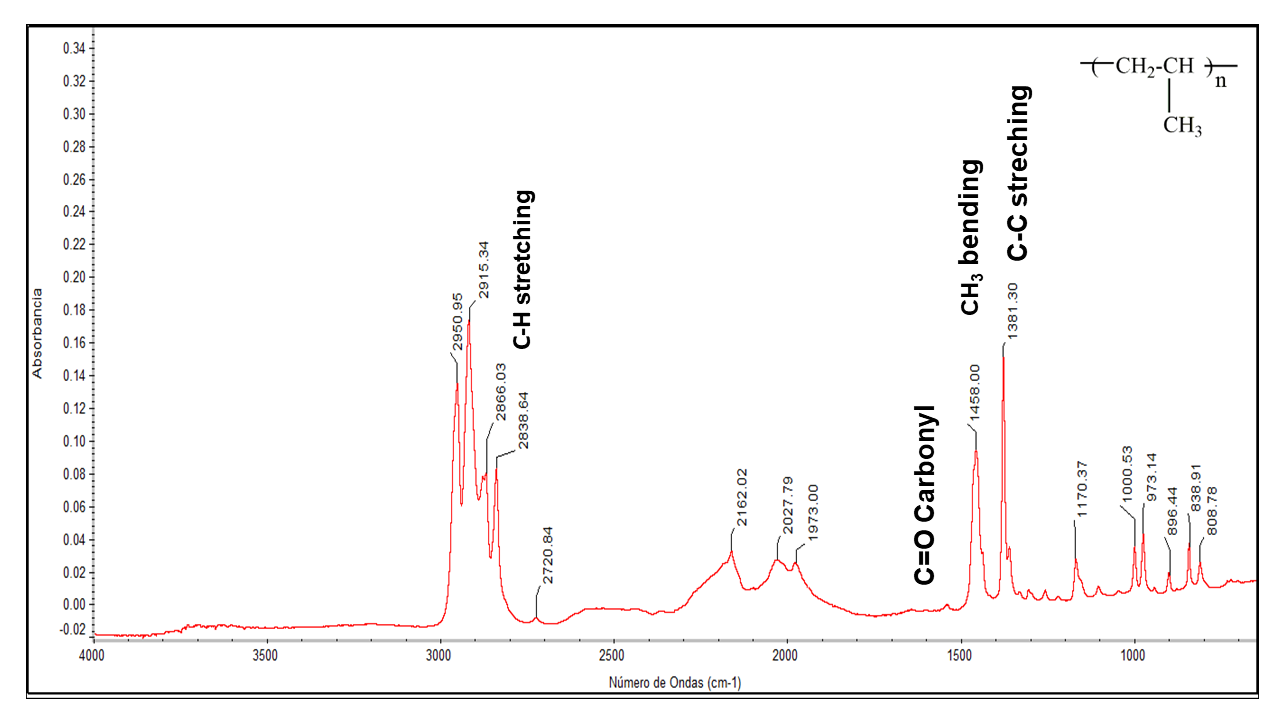


**Figure S3-17.** FTIR-ATR absorbance spectrum of pristine PP food container**.**

**
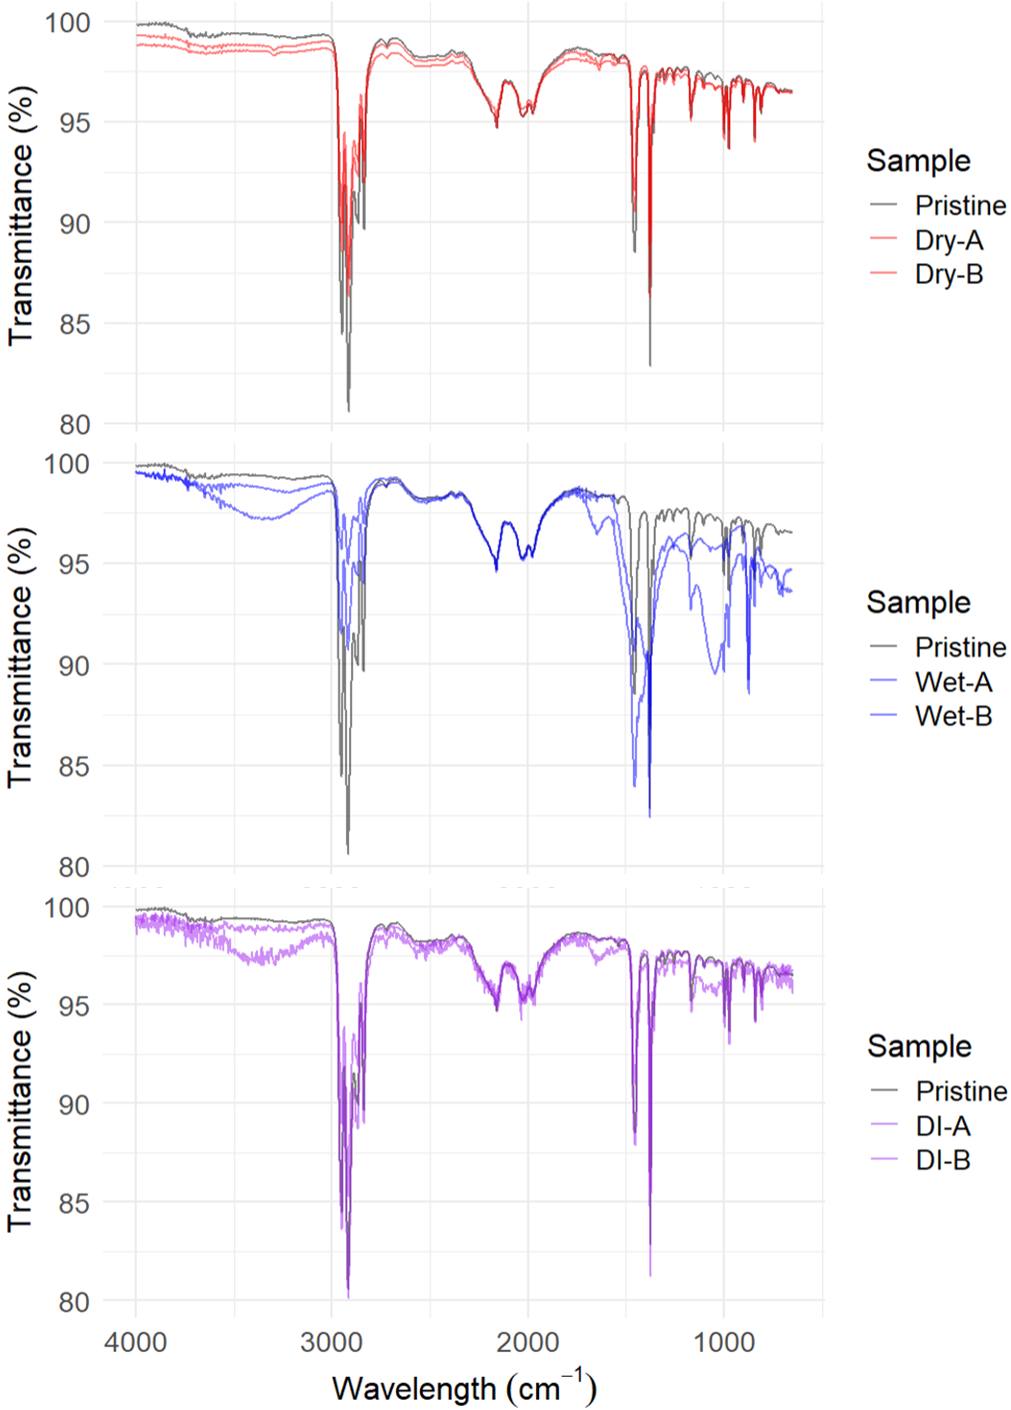
**

**Figure S3-18.** FTIR-ATR transmittance spectra of pristine, dry, and wet weathered (both in creek water (Wet) and deionized water (DI)) PP food container**.**

**Table S3-10.** Main bonds and wavenumbers found pristine bioplastic (PP+CC) food container.

| **Functional group or bond.** | **Reference wavenumber (cm-1) for polypropylene (PP).** | **Wavenumber of pristine bioplastic container (cm-1).** |
| --- | --- | --- |
| C-H stretching | 2900 | 2954, 2966, 2839 |
| C-C stretching | 1350-1450 | 1376 |
| CH3 bending | 1450 y 1375 | 1455 y 1376 |
| -OH Hydroxyl | 3750-3300 | ---- |
| C= O Carbonyl |  | 1625 weak signal |
| C-O unsaturated | 1200-1000 | 1047 |

**
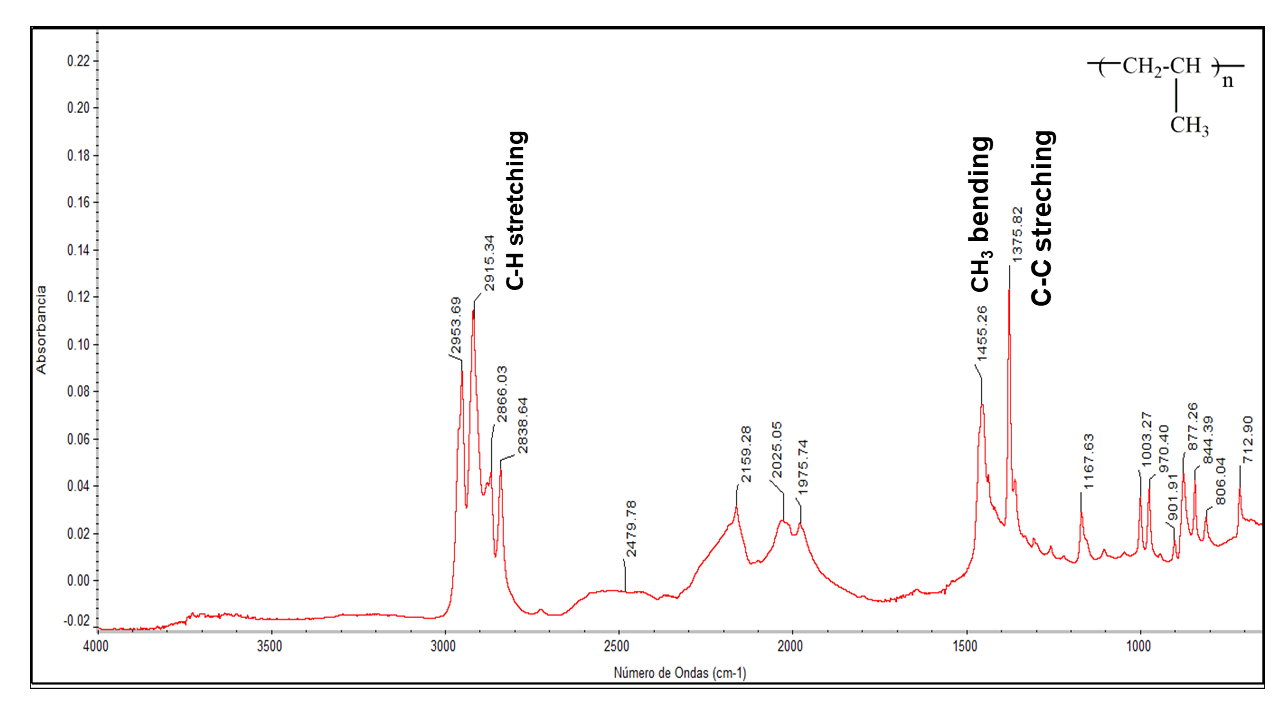
**

**Figure S3-19.** FTIR-ATR absorbance spectrum of pristine bioplastic food container**.**

**
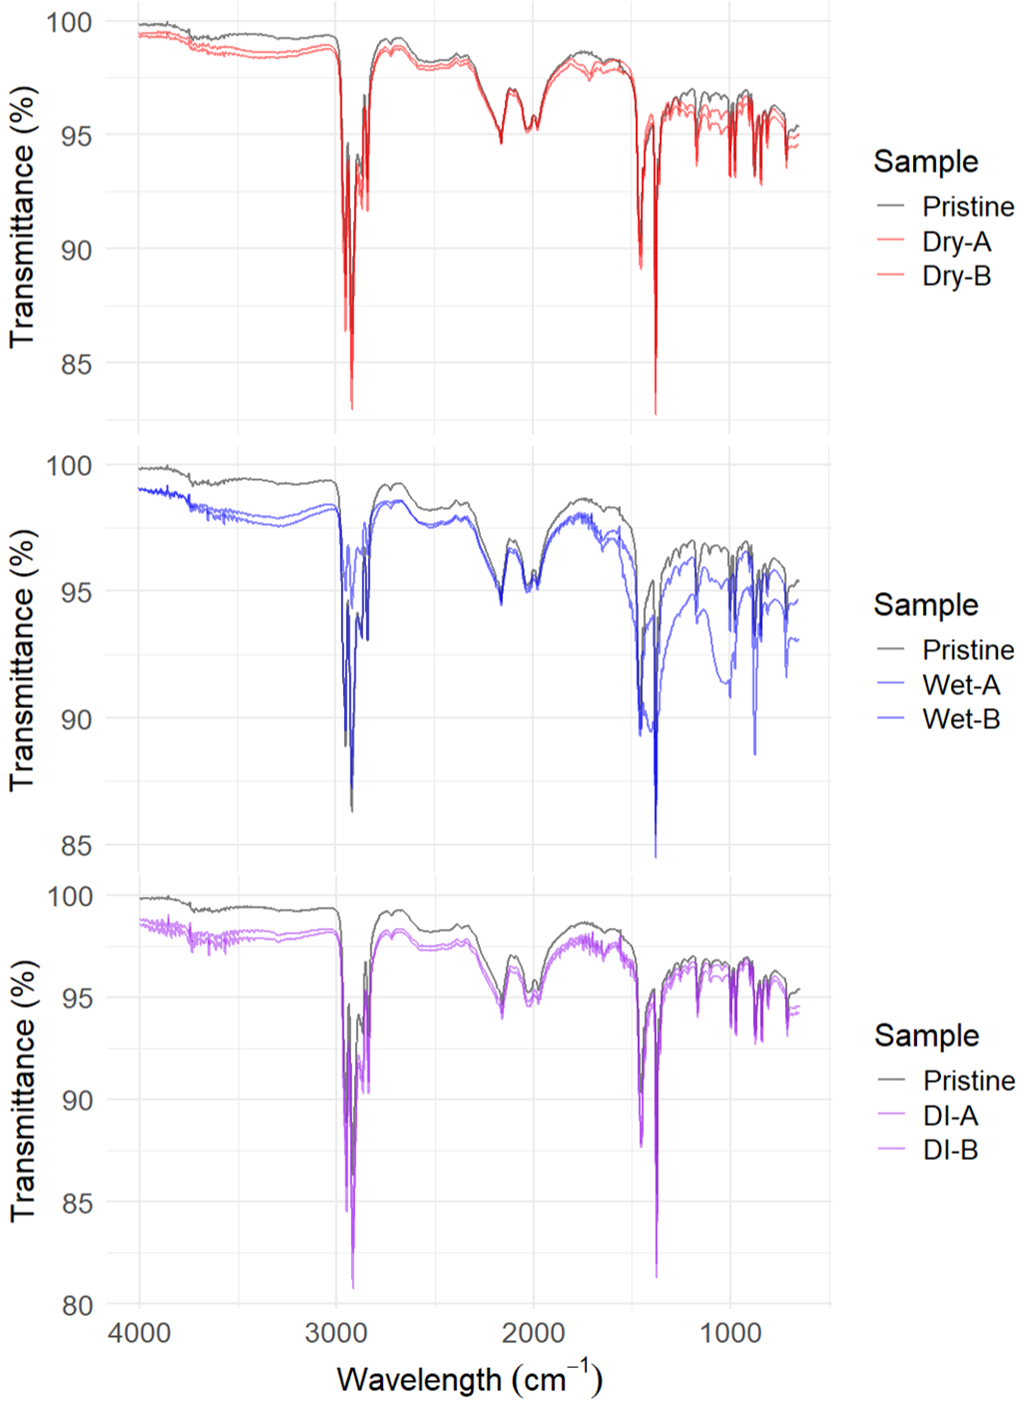
**

**Figure S3-20.** FTIR-ATR transmittance spectra of pristine, dry, and wet weathered (both in creek water (Wet) and deionized water (DI)) bioplastic food container**.**
